# Supplementary material for: α,β-Unsubstitutedmeso-positioning thienyl BODIPY: a promising electron deficient building block for the development of near infrared (NIR) p-type donor–acceptor (D–A) conjugated polymers
Source: Royal Society of Chemistry journal article supplement (doi:10.1039/c7tc05900k), 2018-01-01
Supplement: c7tc05900k1.pdf [file c7tc05900k1.pdf]

## Electronic Supporting Information

### **$\alpha,\beta$ -Unsubstituted *meso*-Positioning Thienyl BODIPY: A Promising Electron Deficient Building Block for the Development of Near Infrared (NIR) *p*-type Donor-Acceptor (D-A) Conjugated Polymers**

Benedetta M. Squeo,<sup>[a]</sup> Vasilis G. Gregoriou,<sup>[a,b]</sup> Yang Han<sup>[c]</sup> Alex Palma-Cando,<sup>[d]</sup> Sybille Allard,<sup>[d]</sup> Efthymis Serpetzoglou,<sup>[e]</sup> Ioannis Konidakis,<sup>[e]</sup> Emmanuel Stratakis,<sup>[e]</sup> Apostolos Avgeropoulos,<sup>[f]</sup> Thomas D. Anthopoulos,<sup>[g,h]</sup> Martin Heeney,<sup>[c]</sup> Ullrich Scherf,<sup>[d]</sup> Christos L. Chochos<sup>[a,f]\*</sup>

<sup>[a]</sup> Advent Technologies SA, Patras Science Park, Stadiou Street, Platani-Rio, 26504, Patra, Greece.

<sup>[b]</sup> National Hellenic Research Foundation (NHRF), 48 Vassileos Constantinou Avenue, Athens 11635, Greece.

<sup>[c]</sup> Department of Chemistry and Centre for Plastic Electronics, Imperial College London, Exhibition Road, South Kensington, London, SW7 2AY, UK.

<sup>[d]</sup> Macromolecular Chemistry Group (buwmakro) and Institute for Polymer Technology, Bergische Universität Wuppertal, Gaußstraße 20, D-42119 Wuppertal, Germany.

<sup>[e]</sup> Institute of Electronic Structure and Laser, Foundation for Research and Technology – Hellas, P. O. Box 1527, Heraklion, Crete, Greece

<sup>[f]</sup> Department of Materials Science Engineering, University of Ioannina, Ioannina 45110, Greece.

<sup>[g]</sup> Department of Physics and Centre for Plastic Electronics, Imperial College London, Exhibition Road, South Kensington, London, SW7 2AY, UK.

<sup>[h]</sup> Division of Physical Sciences and Engineering, King Abdullah University of Science and Technology, Thuwal 23955-6900, Saudi Arabia.

E-mail address: [cchochos@advent-energy.com](mailto:cchochos@advent-energy.com)

| <b>Contents</b>                                                       | <b>Page</b> |
|-----------------------------------------------------------------------|-------------|
| <b>S1. Experimental Section</b>                                       | <b>S3</b>   |
| <b>S1.1. General Experimental Procedures</b>                          | <b>S3</b>   |
| <b>S1.2. Synthesis of BODIPY starting precursors</b>                  | <b>S3</b>   |
| <b>S1.3. Stille Couplings Polymerisations</b>                         | <b>S5</b>   |
| <b>S1.4. Instrumentation</b>                                          | <b>S6</b>   |
| <b>S2. Computational data</b>                                         | <b>S10</b>  |
| <b>S3. NMR spectra of all new compounds</b>                           | <b>S33</b>  |
| <b>S4. Mass spectrum of the final compound</b>                        | <b>S38</b>  |
| <b>S5. Absorption spectra of the monomers</b>                         | <b>S39</b>  |
| <b>S6. Gel permeation chromatography (GPC) graphs of the polymers</b> | <b>S40</b>  |
| <b>S7. Hole mobility measurements</b>                                 | <b>S42</b>  |
| <b>S8. Electron mobility measurements</b>                             | <b>S43</b>  |
| <b>S9. References</b>                                                 | <b>S44</b>  |

## S1. Experimental Section

### S1.1. General Experimental Procedures

All glassware was washed using detergent (Teepol), rinsed with excess water, acetone and methylene dichloride and dried in an oven at *ca.* 120 °C. *N*-Bromosuccinimide (NBS) was recrystallized from water. Acetonitrile and toluene were distilled over CaH<sub>2</sub> before use. Reactions were protected from moisture with CaCl<sub>2</sub> drying tubes or carried out under an Ar atmosphere. Anhydrous Na<sub>2</sub>SO<sub>4</sub> was used for drying organic extracts and all volatiles were removed under reduced pressure. All reaction mixtures and column eluents were monitored by thin layer chromatography (TLC) using commercial glass backed TLC plates (Merck Kieselgel 60 F<sub>254</sub>). The plates were observed under UV light at 254 and 365 nm. The technique of dry flash chromatography was used throughout for all non-TLC scale chromatographic separations using Merck Silica Gel 60 (less than 0.063 mm).<sup>S1</sup> (4,4'-didodecyl-2,2'-bithiophene-5,5'-diyl)bis(trimethylstannane) (**16**) and (3,3'-didodecyl-2,2'-bithiophene-5,5'-diyl)bis(trimethylstannane) (**17**) (Scheme 1) were purchased from Solarmer Materials Inc. and used as received. The 2,8-dibromo-5,5-difluoro-10-(5-octylthiophen-2-yl)-5*H*-4λ<sup>4</sup>,5λ<sup>4</sup>-dipyrrolo[1,2-*c*:2',1'-*f*][1,3,2]diazaborinine (**13**) in Scheme 1 was prepared according to literature procedure.<sup>S2</sup>

### S1.2. Synthesis of BODIPY starting precursors

*1.2.1* 5,5-difluoro-10-(5-octylthiophen-2-yl)-2,8-di(thiophen-2-yl)-5*H*-4λ<sup>4</sup>,5λ<sup>4</sup>-dipyrrolo[1,2-*c*:2',1'-*f*][1,3,2]diazaborinine (**14**).

A solution of the commercially available 2-tributylstannylthiophene (2.3 mol) and the 2,8-dibromo-5,5-difluoro-10-(5-octylthiophen-2-yl)-5*H*-4λ<sup>4</sup>,5λ<sup>4</sup>-dipyrrolo[1,2-*c*:2',1'-*f*][1,3,2]diazaborinine (**13**) (0.92 mol) were combined in dry deoxygenated toluene in the presence

of tris(dibenzylideneacetone)dipalladium(0) [Pd<sub>2</sub>(dba)<sub>3</sub>] (2 mol%) and tri-*o*-tolylphosphine [P(*o*-Tol)<sub>3</sub>] (4 mol%) and the mixture was heated to ca. 120 °C for 4 hours. Then, the reaction mixture was filtered through a pad of celite and the toluene solution was evaporated and dried under high vacuum. Purification was achieved by silica gel chromatography using as eluent a hexane/chloroform mixture (1:1). The resulting pure compound is an orange solid with yield 79% (0.40 g).

<sup>1</sup>H NMR (CDCl<sub>3</sub>, 300 MHz): δ 8.14 (s, 2H), 7.53 (d, 1H), 7.33 (s, 2H), 7.24 (dd, <sup>3</sup>J = 7.24, 2H), 7.21 (dd, <sup>3</sup>J = 7.21, 2H), 7.05 (dd, <sup>3</sup>J = 7.05, 2H), 7.04 (d, 1H), 2.97 (t, 2H), 1.80 (quintuplet, 2H), 1.46 (m, 12H), 0.90 (t, 3H).

<sup>13</sup>C NMR (CDCl<sub>3</sub>, 100 MHz): δ 154.72 (s), 140.74 (s), 139.03 (s), 135.90 (s), 134.57 (s), 134.08 (s), 131.98 (s), 128.02 (m), 127.90 (s), 126.14 (s), 124.69 (s), 124.28 (s), 123.35 (s), 99.51 (s), 31.82 (s), 31.44 (s), 30.48 (s), 29.69 (m), 29.26-29.18 (t), 22.63 (s), 14.08 (s)

*1.2.2 2,8-bis(5-bromothiophen-2-yl)-5,5-difluoro-10-(5-octylthiophen-2-yl)-5H-4λ<sup>4</sup>,5λ<sup>4</sup>-dipyrrolo[1,2-c:2',1'-f][1,3,2]diazaborinine (15).*

In a predegassed flask, **14** (0.72 mol) was dissolved in fresh dried DMF, then recrystallized NBS (1.44 mol) was added portion wise (three times) in a period of 30 minutes. The mixture was stirred at room temperature for 3 hours. The mixture was diluted in chloroform and washed with water three times. The solvent were removed under reduced pressure and the crude compound was purified through silica gel chromatography using as eluent a hexane/chloroform mixture (7:3). The resulting pure compound is a red-orange solid with yield 68%.

<sup>1</sup>H NMR (CDCl<sub>3</sub>, 300 MHz): δ 8.07 (s, 2H), 7.51 (d, 1H), 7.04 (d, 2H), 7.0 (d, 1H), 6.95 (d, 2H), 2.97 (t, 2H), 1.80 (quintuplet, 2H), 1.31 (m, 12H), 0.90 (t, 3H).

$^{13}\text{C}$  NMR ( $\text{CDCl}_3$ , 100 MHz):  $\delta$  155.28 (s), 140.37 (s), 139.36 (s), 137.47 (s), 134.53-134.36 (d), 131.83 (s), 130.73 (s), 127.21 (s), 126.30 (s), 124.60 (s), 123.53 (s), 110.95 (s), 31.81 (s), 31.42 (s), 30.50 (s), 29.67 (s), 29.25-29.17 (t), 22.63 (s), 14.07 (s)

$m/z$  [FD+(eiFI)]: 704.98 ( $\text{M}^+-1$ , 12%), 705.97 ( $\text{M}^+$ , 50%), 706.97 ( $\text{MH}^+$ , 40%), 707.97 ( $\text{MH}^++1$ , 100%), 708.97 ( $\text{MH}^++2$ , 49%), 709.97 ( $\text{MH}^++3$ , 77%), 710.97 ( $\text{MH}^++4$ , 22%), 711.97 ( $\text{MH}^++5$ , 11%)

### S1.3. Stille Couplings Polymerizations

#### 1.3.1. Polymer of BODIPY-*q*Ti (Typical procedure).

A solution of monomer **15** (1 eq) and 4,4'-didodecyl-2,2'-bithiophene-5,5'-diyl)bis(trimethylstannane) **16** (1 eq), were combined in dry deoxygenated toluene in the presence of tris(dibenzylideneacetone)dipalladium(0) [ $\text{Pd}_2(\text{dba})_3$ ] (2 mol%) and tri-*o*-tolylphosphine [ $\text{P}(\text{o-Tol})_3$ ] (4 mol%) and the mixture was heated to ca. 120°C for 48 h to provide the desired crude polymer. The polymer was purified by precipitation in methanol, filtered and washed on Soxhlet extraction with ethylacetate (200 mL, 1 d), dichloromethane (200 mL, 1 d), chloroform (200 mL, 1 d) and chlorobenzene (150 mL, 1d). The chlorofobenzene fraction was then concentrated under reduced pressure, precipitated in methanol, filtered and dried in vacuum. The resulting greenish polymer solid (74 mg, 33%) is readily soluble in hot chlorobenzene and *o*-dichlorobenzene (*o*-DCB).

#### 1.3.2. Polymer of bis(trimethylstannyl)tetra(5-*n*-hexyl)thien-2-yl-IDT and 3,5-dichloro-4H-1,2,6-thiadiazin-4-one (**6**).

A solution of monomer **15** (1 eq) and readily available 3,3'-didodecyl-2,2'-bithiophene-5,5'-diyl)bis(trimethylstannane) **17** (1 eq), were combined in dry deoxygenated toluene in the presence

of tris(dibenzylideneacetone)dipalladium(0) [Pd<sub>2</sub>(dba)<sub>3</sub>] (2 mol%) and tri-*o*-tolylphosphine [P(*o*-Tol)<sub>3</sub>] (4 mol%) and the mixture was heated to ca. 120°C for 48 h to provide the desired crude polymer. The polymer was purified by precipitation in methanol, filtered and washed on Soxhlet extraction with ethylacetate (200 mL, 1 d), dichloromethane (200 mL, 1 d) and chloroform (200 mL, 1 d). The chloroform fraction was then concentrated under reduced pressure, precipitated in methanol, filtered and dried in vacuum. The resulting greenish polymer solid (152 mg, 67%) is readily soluble in chloroform, chlorobenzene and *o*-dichlorobenzene (*o*-DCB).

#### **S1.4. Instrumentation**

<sup>1</sup>H-, and <sup>13</sup>C- NMR spectra were recorded on a Varian V300 MHz. Deuterated solvent (chloroform) was used for homonuclear lock and the signals are referenced to the deuterated solvent peaks. Field desorption (FD) and field ionization (FI) mass spectra were recorded on a JEOL Ltd. JMS-T200GC AccuTOF GCx High Performance Gas Chromatograph – Time-of-Flight Mass Spectrometer with sample inlet FI/FD.

*Gel Permeation Chromatography (GPC)*: Average molecular weights per number ( $\overline{M}_n$ ) and dispersity ( $\mathcal{D}$ ) were determined with Gel Permeation Chromatography (GPC) at 150 °C on a high temperature PL-GPC 220 system using a PL-GEL 10 μm guard column, two PL-GEL 10 μm Mixed-B columns and *ortho*-dichlorobenzene (*o*-DCB) as the eluent. The instrument was calibrated with narrow polystyrene standards with  $M_p$  ranging from 4830 g/mol to 3242000 g/mol.

*The UV-Vis absorption spectra* of the examined polymer solutions and pristine films were measured using a LAMBDA 950 UV/VIS/NIR (Perkin Elmer) spectrophotometer from 300 nm to 2000 nm with 1 nm resolution. All measurements were performed at room temperature.

*Micro-photoluminescence ( $\mu$ PL)* studies were performed at 295 K, using a setup in backscattering geometry with a He–Ne 543 nm continuous wave laser as the excitation source. The laser beam was focused down to 1  $\mu$ m on the sample through an objective lens (Mitutoyo 50 $\times$ ), placed on an XYZ translation stage, at normal incidence and the power was 760  $\mu$ W.

*Transient absorption spectroscopy (TAS)* measurements were performed on a Newport (TAS-1) transient absorption spectrometer, equipped with a source pulsed laser beam generated from an Yb:KGW-based laser system (PHAROS, Light Conversion), emitting at 1026 nm, with a pulse duration of 170 fs and 1 KHz repetition rate. The fundamental beam is split, so that the probe beam component (10% of the source) passes through a delay line and routed on a YAG crystal, which generates a super continuum white light of 500-1000 nm. The other part of the incident beam (90% of the source), is used as the pump beam for sample excitation. The energy of the pump beam can be controlled by a variable reflective neutral density filter inside the TAS instrument, or by altering the power of the employed 1026 nm fundamental laser beam. For all measurements, the probe light is coupled through an optical fiber to a multichannel detector and monitored as a function of wavelength. In a typical TAS pump-probe experiment, the sample is excited by the pump beam, and the corresponding decay dynamics of the sample's relative optical density are recorded as a function of wavelength at various time delays after photo-excitation.

*Electrochemical measurements:* Cyclic Voltammetry was employed to determine the  $E_{\text{HOMO}}$  and  $E_{\text{LUMO}}$  levels of **BODIPY-qTi** and **BODIPY-qTo** by their corresponding oxidation ( $E^{\text{ox}}$ ) and reduction ( $E^{\text{red}}$ ) potentials. A three electrode electrochemical cell was used with a modified glassy carbon disk as working electrode, Pt wire as counter electron and Ag/AgCl (1 M KCl) as reference electrode in pre-dried and deaerated acetonitrile solution containing *n*-Bu<sub>4</sub>NPF<sub>6</sub> (0.1 M) as an electrolyte. Polished Pt disk electrodes were coated with **BODIPY-qTi** and **BODIPY-qTo** via a

drop casting method. Concentrated solutions of **BODIPY-qTi** and **BODIPY-qTo** (0.5 mg) in *o*-DCB (0.2 ml) were prepared and were drop casted ( $3 \times 1 \mu\text{l}$  aliquots) onto the Pt disk electrodes. Thin films of **BODIPY-qTi** and **BODIPY-qTo** were formed onto the electrode's surface after evaporation of the *o*-DCB solutions under standard conditions (*i.e. ca.* 20 °C, 1 atm). All electrodes were washed with distilled acetonitrile prior to use. Scan rate 50 mV s<sup>-1</sup>. Temperature = 20 °C. Fc/Fc<sup>+</sup> was used as an internal reference. Both the oxidation ( $E^{\text{ox}}$ ) and reduction ( $E^{\text{red}}$ ) potentials are calculated from their corresponding onsets. The  $E_{\text{HOMO}}$  and  $E_{\text{LUMO}}$  levels were estimated by  $E_{\text{LUMO/HOMO}} = -(4.7 + E_{\text{on}}^{\text{red/ox}}) \text{ eV}$ .<sup>S3</sup>

*Theoretical Calculations:* All calculations of the model compounds studied in this work have been performed using the Gaussian 03 software package.<sup>S4</sup> The alkyl side chains substituents anchored onto the DPP and the peripheral thienyl rings have been replaced with methyl groups in the model compounds for our calculations. While the presence of these long alkyl chains enhances the solubility of these polymers and affects the charge carrier mobility and photovoltaic behavior of the polymer,<sup>S5-S7</sup> from a computational point of view their replacement with shorter chains does not affect their optoelectronic properties (HOMO, LUMO and band gap) and thus the optimized structures of the molecules.<sup>S8,S9</sup> The ground-state geometry of each model compound has been determined by a full geometry optimization of its structural parameters using the DFT calculations, upon energy minimization of all possible isomers. In this work, the DFT calculations were performed using the Becke's three-parameter hybrid functional, B3, with non-local correlation of Lee-Yang-Parr, LYP, abbreviated as B3LYP<sup>S10,S11</sup> in conjunction with the 6-311G(d,p) split valence polarized basis set. All calculations were performed taking into account that the system is under vacuum conditions. No symmetry constraints were imposed during the optimization process. The geometry optimizations have been performed with a tight threshold that corresponds to root



mean square (rms) residual forces smaller than  $10^{-5}$  au for the optimal geometry. The visualization of the molecular orbitals has been performed using GaussView 5.0.

*OFET device fabrication procedures: Hole mobility measurements:* Bottom contact/top gate (BC/TG) devices were fabricated on glass substrates using Au (40 nm) source-drain electrodes and CYTOP dielectric. Au electrodes were treated with pentafluorobenzene thiol (PFBT) SAM to increase the work function. Polymers were dissolved in chloroform at a concentration of 10 mg/mL, and spun cast at 2000 rpm onto the substrate for 60 s. The obtained polymer films were thermally annealed at 100 °C for 30 min, before spin coating of CYTOP dielectric (900 nm). The devices were completed by evaporation of Al (40 nm) gate through shadow masks. The channel width and length of the transistors are 1000  $\mu\text{m}$  and 50  $\mu\text{m}$ , respectively. A Keithley 4200 parameter analyzer was used to characterise the transistors under nitrogen. Linear mobility was calculated according

to the equation below:  $\mu_{lin} = \frac{L}{WC_i V_D} \left( \frac{\partial I_{D lin}}{\partial V_G} \right)$

And saturation mobility was extracted from the slope of  $I_D^{1/2}$  vs.  $V_G$ :  $\mu_{sat} = \frac{2L}{WC_i} \left( \frac{\partial \sqrt{I_{D sat}}}{\partial V_G} \right)^2$

Performance parameters were averaged over ~6 devices.

*Electron mobility measurements:* Bottom gate/top contact devices were fabricated on heavily doped n<sup>+</sup>-Si (100) wafers with 400 nm-thick thermally grown SiO<sub>2</sub>. The Si/SiO<sub>2</sub> substrates were treated with BCB<sup>S12</sup> to improve electron transport. Polymers were dissolved in chloroform at a concentration of 10 mg/mL, and spun cast at 2000 rpm onto the substrate for 60 s. The obtained polymer films were thermally annealed at 100 °C for 30 min. Al (40nm) source and drain electrodes were deposited onto the polymer film under vacuum through shadow masks. The channel width and length of the transistors are 1000  $\mu\text{m}$  and 40  $\mu\text{m}$ , respectively.

## S2. Computational data

### S2.1 Molecular Orbitals and Atomic coordinates of the geometry optimized structures

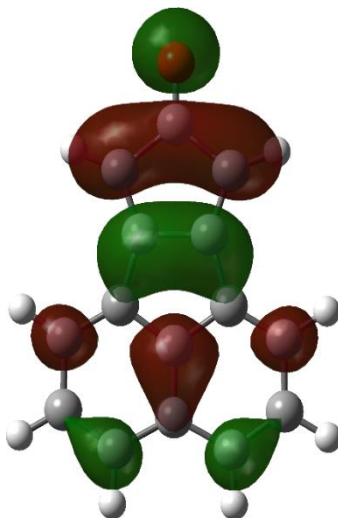

$$E_{\text{LUMO}} = -2.86 \text{ eV}$$

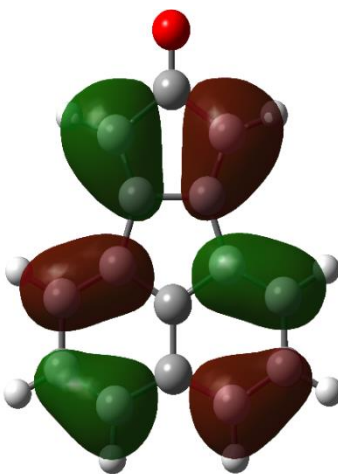

$$E_{\text{HOMO}} = -5.93 \text{ eV}$$

$$\text{Dipole moment } (\mu) = 4.6925 \text{ D}$$

**Fig. S1** Molecular Orbitals for the Singlet Ground State of cyclopentadienone as calculated with DFT RB3LYP/6-311G(d,p). Hydrogens are omitted for clarity.

Atomic coordinates of the optimised geometry of cyclopentadienone using DFT/B3LYP/6-311G(d,p)

| -----            |                  |                        |              |              |  |
|------------------|------------------|------------------------|--------------|--------------|--|
| Center<br>Number | Atomic<br>Number | Forces (Hartrees/Bohr) |              |              |  |
|                  |                  | X                      | Y            | Z            |  |
| -----            |                  |                        |              |              |  |
| 1                | 6                | 0.000000000            | 0.000061453  | 0.000038464  |  |
| 2                | 6                | 0.000000000            | 0.000083764  | -0.000578930 |  |
| 3                | 6                | 0.000000000            | -0.000383620 | 0.000441602  |  |
| 4                | 6                | 0.000000000            | 0.000069266  | 0.000021403  |  |
| 5                | 6                | 0.000000000            | 0.000533949  | 0.000244539  |  |
| 6                | 6                | 0.000000000            | -0.000015758 | 0.000693141  |  |
| 7                | 6                | 0.000000000            | -0.000040030 | -0.000018333 |  |
| 8                | 6                | 0.000000000            | 0.000514520  | -0.000464718 |  |
| 9                | 6                | 0.000000000            | 0.000032741  | -0.000030867 |  |
| 10               | 6                | 0.000000000            | 0.000029692  | -0.000309888 |  |
| 11               | 6                | 0.000000000            | 0.000088973  | 0.000307508  |  |
| 12               | 6                | 0.000000000            | -0.000569788 | -0.000260952 |  |
| 13               | 6                | 0.000000000            | 0.000290951  | -0.000133510 |  |
| 14               | 6                | 0.000000000            | -0.000215236 | 0.000224912  |  |
| 15               | 6                | 0.000000000            | -0.000001983 | 0.000044953  |  |
| 16               | 8                | 0.000000000            | -0.000302884 | -0.000138715 |  |
| 17               | 1                | 0.000000000            | -0.000093724 | 0.000014026  |  |
| 18               | 1                | 0.000000000            | -0.000050604 | -0.000080125 |  |
| 19               | 1                | 0.000000000            | 0.000017985  | -0.000021410 |  |
| 20               | 1                | 0.000000000            | -0.000017075 | 0.000026789  |  |
| 21               | 1                | 0.000000000            | -0.000019464 | -0.000006706 |  |
| 22               | 1                | 0.000000000            | -0.000017792 | -0.000010357 |  |
| 23               | 1                | 0.000000000            | 0.000009129  | -0.000030428 |  |
| 24               | 1                | 0.000000000            | -0.000004462 | 0.000027604  |  |
| -----            |                  |                        |              |              |  |

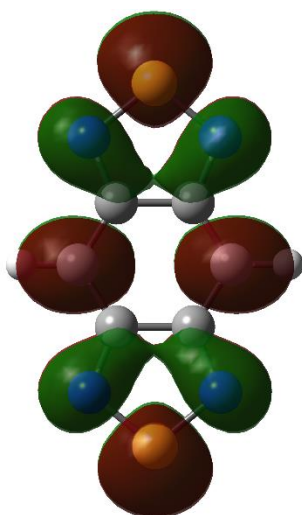

$$E_{\text{LUMO}} = -3.74 \text{ eV}$$

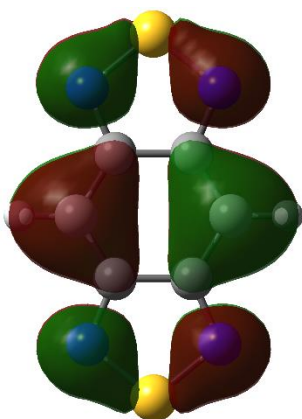

$$E_{\text{HOMO}} = -6.40 \text{ eV}$$

$$\text{Dipole moment } (\mu) = 0.0014 \text{ D}$$

**Fig. S2** Molecular Orbitals for the Singlet Ground State of benzobisthiadiazole as calculated with DFT RB3LYP/6-311G(d,p). Hydrogens are omitted for clarity.

Atomic coordinates of the optimised geometry of benzobisthiadiazole using DFT/B3LYP/6-311G(d,p)

| Center<br>Number | Atomic<br>Number | Forces (Hartrees/Bohr) |              |              |
|------------------|------------------|------------------------|--------------|--------------|
|                  |                  | X                      | Y            | Z            |
| 1                | 6                | 0.000015130            | -0.000107358 | 0.000117851  |
| 2                | 6                | -0.000022152           | -0.000105802 | 0.000471751  |
| 3                | 6                | 0.000070624            | -0.000084203 | -0.000471335 |
| 4                | 6                | 0.000038271            | -0.000101970 | -0.000117392 |
| 5                | 6                | -0.000070162           | 0.000347402  | -0.000177914 |
| 6                | 6                | -0.000105018           | 0.000339287  | 0.000176408  |
| 7                | 7                | 0.000106952            | -0.000268738 | -0.000367808 |
| 8                | 16               | 0.000020512            | -0.000080404 | 0.000000176  |
| 9                | 7                | 0.000034467            | -0.000285614 | 0.000369023  |
| 10               | 7                | -0.000054014           | 0.000246324  | -0.000085214 |
| 11               | 16               | 0.000074979            | -0.000293911 | 0.000000645  |
| 12               | 7                | -0.000070674           | 0.000242445  | 0.000084142  |
| 13               | 1                | -0.000019233           | 0.000076323  | -0.000002446 |
| 14               | 1                | -0.000019681           | 0.000076219  | 0.000002111  |

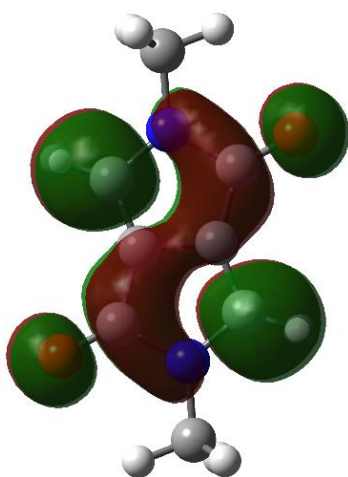

$$E_{\text{LUMO}} = -2.40 \text{ eV}$$

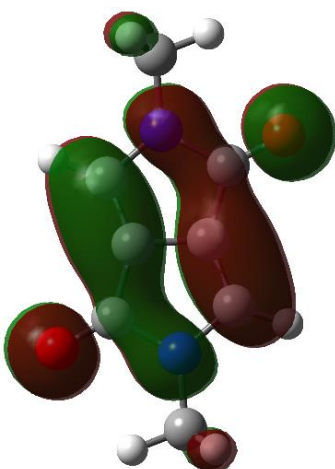

$$E_{\text{HOMO}} = -5.73 \text{ eV}$$

$$\text{Dipole moment } (\mu) = 0.0019 \text{ D}$$

**Fig. S3** Molecular Orbitals for the Singlet Ground State of diketopyrrolopyrrole as calculated with DFT RB3LYP/6-311G(d,p). Hydrogens are omitted for clarity.

Atomic coordinates of the optimised geometry of diketopyrrolopyrrole using DFT/B3LYP/6-311G(d,p)

| Center<br>Number | Atomic<br>Number | Forces (Hartrees/Bohr) |              |              |
|------------------|------------------|------------------------|--------------|--------------|
|                  |                  | X                      | Y            | Z            |
| 1                | 6                | 0.000018634            | -0.000062870 | 0.000007100  |
| 2                | 6                | -0.000028516           | -0.000030538 | -0.000045760 |
| 3                | 6                | -0.000028516           | 0.000030538  | 0.000045760  |
| 4                | 6                | 0.000016544            | -0.000003954 | -0.000023218 |
| 5                | 7                | 0.000001574            | 0.000059012  | 0.000017463  |
| 6                | 6                | 0.000016544            | 0.000003954  | 0.000023218  |
| 7                | 7                | 0.000001574            | -0.000059012 | -0.000017463 |
| 8                | 6                | 0.000018634            | 0.000062870  | -0.000007100 |
| 9                | 8                | -0.000003171           | -0.000021014 | -0.000006190 |
| 10               | 8                | -0.000003171           | 0.000021014  | 0.000006190  |
| 11               | 6                | -0.000001318           | -0.000040963 | -0.000011800 |
| 12               | 6                | -0.000001318           | 0.000040963  | 0.000011800  |
| 13               | 1                | -0.000003916           | -0.000006984 | -0.000001687 |
| 14               | 1                | -0.000003916           | 0.000006984  | 0.000001687  |
| 15               | 1                | 0.000004453            | 0.000011656  | 0.000001557  |
| 16               | 1                | -0.000004329           | 0.000010692  | 0.000001023  |
| 17               | 1                | 0.000000044            | 0.000015328  | 0.000004028  |
| 18               | 1                | 0.000004453            | -0.000011656 | -0.000001557 |
| 19               | 1                | -0.000004329           | -0.000010692 | -0.000001023 |
| 20               | 1                | 0.000000044            | -0.000015328 | -0.000004028 |

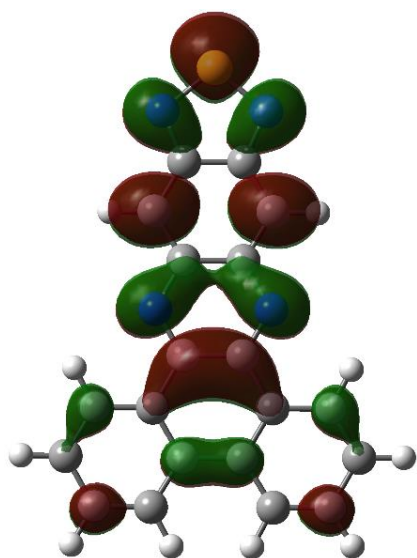

$$E_{\text{LUMO}} = -3.41 \text{ eV}$$

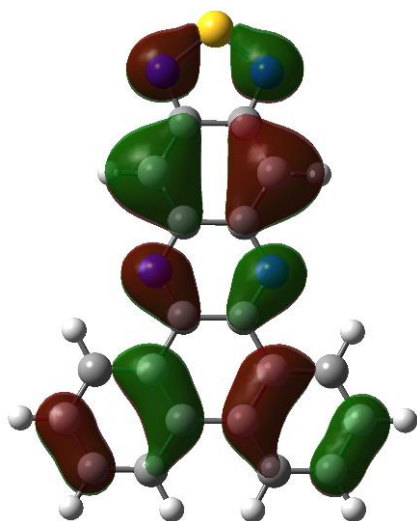

$$E_{\text{HOMO}} = -6.15 \text{ eV}$$

$$\text{Dipole moment } (\mu) = 3.2016 \text{ D}$$

**Fig. S4** Molecular Orbitals for the Singlet Ground State of phenanthrene-condensed thiadiazoloquinoxaline as calculated with DFT RB3LYP/6-311G(d,p). Hydrogens are omitted for clarity.



Atomic coordinates of the optimised geometry of phenanthrene-condensed thiadiazoloquinoxaline using DFT/B3LYP/6-311G(d,p)

| Center Number | Atomic Number | Forces (Hartrees/Bohr) |              |              |
|---------------|---------------|------------------------|--------------|--------------|
|               |               | X                      | Y            | Z            |
| 1             | 6             | 0.000000000            | -0.000063455 | -0.000015987 |
| 2             | 6             | 0.000000000            | -0.000011221 | 0.000185011  |
| 3             | 6             | 0.000000000            | -0.000045653 | -0.000179640 |
| 4             | 6             | 0.000000000            | -0.000059341 | 0.000027582  |
| 5             | 6             | 0.000000000            | -0.000210404 | 0.000083614  |
| 6             | 6             | 0.000000000            | -0.000222336 | -0.000042752 |
| 7             | 7             | 0.000000000            | 0.000216790  | 0.000113071  |
| 8             | 16            | 0.000000000            | 0.000066840  | -0.000006311 |
| 9             | 7             | 0.000000000            | 0.000191794  | -0.000151652 |
| 10            | 7             | 0.000000000            | 0.000075756  | -0.000070626 |
| 11            | 6             | 0.000000000            | 0.000062691  | -0.000079709 |
| 12            | 6             | 0.000000000            | 0.000076502  | 0.000066566  |
| 13            | 7             | 0.000000000            | 0.000087637  | 0.000055198  |
| 14            | 6             | 0.000000000            | -0.000223669 | -0.000033575 |
| 15            | 6             | 0.000000000            | 0.000129837  | 0.000055614  |
| 16            | 6             | 0.000000000            | 0.000117132  | -0.000078934 |
| 17            | 6             | 0.000000000            | -0.000213431 | 0.000074848  |
| 18            | 6             | 0.000000000            | -0.000033504 | 0.000015433  |
| 19            | 6             | 0.000000000            | 0.000033193  | -0.000039256 |
| 20            | 6             | 0.000000000            | -0.000039018 | 0.000012159  |
| 21            | 6             | 0.000000000            | 0.000042060  | 0.000004281  |
| 22            | 6             | 0.000000000            | 0.000040515  | -0.000012078 |
| 23            | 6             | 0.000000000            | -0.000040605 | -0.000004641 |
| 24            | 6             | 0.000000000            | 0.000039954  | 0.000032349  |
| 25            | 6             | 0.000000000            | -0.000035801 | -0.000008889 |
| 26            | 1             | 0.000000000            | -0.000006897 | 0.000007357  |
| 27            | 1             | 0.000000000            | -0.000008152 | -0.000005936 |
| 28            | 1             | 0.000000000            | 0.000001717  | -0.000034349 |
| 29            | 1             | 0.000000000            | 0.000001111  | -0.000020170 |
| 30            | 1             | 0.000000000            | -0.000016721 | -0.000003054 |
| 31            | 1             | 0.000000000            | 0.000023609  | -0.000014693 |
| 32            | 1             | 0.000000000            | 0.000025942  | 0.000010015  |
| 33            | 1             | 0.000000000            | -0.000015854 | 0.000006129  |
| 34            | 1             | 0.000000000            | 0.000004867  | 0.000019605  |
| 35            | 1             | 0.000000000            | 0.000008116  | 0.000033421  |

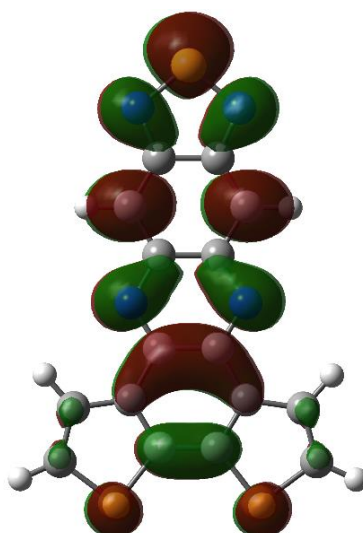

$$E_{\text{LUMO}} = -3.48 \text{ eV}$$

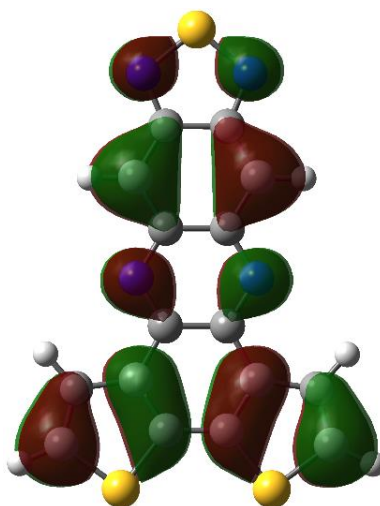

$$E_{\text{HOMO}} = -5.94 \text{ eV}$$

$$\text{Dipole moment } (\mu) = 2.2495 \text{ D}$$

**Fig. S5** Molecular Orbitals for the Singlet Ground State of benzodithiophene-condensed thiadiazoloquinoxaline as calculated with DFT RB3LYP/6-311G(d,p). Hydrogens are omitted for clarity.

Atomic coordinates of the optimised geometry of benzodithiophene-condensed thiadiazoloquinoxaline using DFT/B3LYP/6-311G(d,p)

| Center Number | Atomic Number | Forces (Hartrees/Bohr) |              |              |
|---------------|---------------|------------------------|--------------|--------------|
|               |               | X                      | Y            | Z            |
| 1             | 6             | 0.000000000            | -0.000073654 | -0.000002848 |
| 2             | 6             | 0.000000000            | -0.000047162 | 0.000111584  |
| 3             | 6             | 0.000000000            | -0.000049559 | -0.000110540 |
| 4             | 6             | 0.000000000            | -0.000073576 | 0.000004437  |
| 5             | 6             | 0.000000000            | -0.000249821 | 0.000043314  |
| 6             | 6             | 0.000000000            | -0.000250698 | -0.000037912 |
| 7             | 7             | 0.000000000            | 0.000230681  | 0.000106602  |
| 8             | 16            | 0.000000000            | 0.000060512  | -0.000000653 |
| 9             | 7             | 0.000000000            | 0.000228327  | -0.000111555 |
| 10            | 7             | 0.000000000            | 0.000102901  | -0.000037616 |
| 11            | 6             | 0.000000000            | -0.000018138 | 0.000070767  |
| 12            | 6             | 0.000000000            | -0.000019661 | -0.000070359 |
| 13            | 7             | 0.000000000            | 0.000103689  | 0.000035386  |
| 14            | 6             | 0.000000000            | -0.000156554 | -0.000109010 |
| 15            | 6             | 0.000000000            | 0.000197160  | -0.000044039 |
| 16            | 6             | 0.000000000            | 0.000198064  | 0.000039774  |
| 17            | 6             | 0.000000000            | -0.000154164 | 0.000112363  |
| 18            | 16            | 0.000000000            | -0.000042818 | -0.000025779 |
| 19            | 6             | 0.000000000            | -0.000010958 | -0.000054993 |
| 20            | 6             | 0.000000000            | 0.000047920  | -0.000029503 |
| 21            | 6             | 0.000000000            | 0.000048546  | 0.000028462  |
| 22            | 6             | 0.000000000            | -0.000009768 | 0.000055217  |
| 23            | 16            | 0.000000000            | -0.000042252 | 0.000026697  |
| 24            | 1             | 0.000000000            | -0.000006526 | 0.000008372  |
| 25            | 1             | 0.000000000            | -0.000006705 | -0.000008229 |
| 26            | 1             | 0.000000000            | -0.000025225 | 0.000017757  |
| 27            | 1             | 0.000000000            | 0.000022408  | -0.000010758 |
| 28            | 1             | 0.000000000            | 0.000022635  | 0.000010271  |
| 29            | 1             | 0.000000000            | -0.000025602 | -0.000017209 |

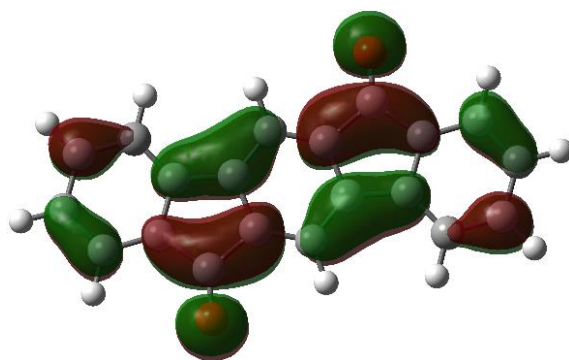

$E_{\text{LUMO}} = -3.13 \text{ eV}$

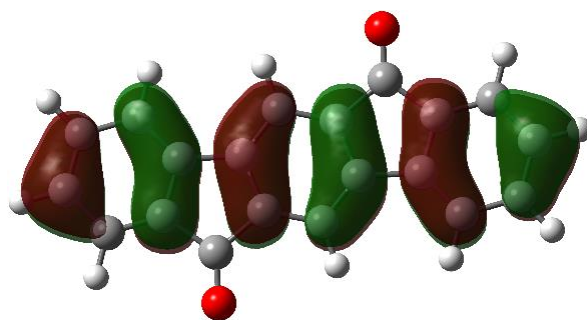

$E_{\text{HOMO}} = -6.30 \text{ eV}$

Dipole moment ( $\mu$ ) = 0.0000 D

**Fig. S6** Molecular Orbitals for the Singlet Ground State of indeno[1,2-*b*]fluorene-6,12-dione as calculated with DFT RB3LYP/6-311G(d,p). Hydrogens are omitted for clarity.

Atomic coordinates of the optimised geometry of indeno[1,2-*b*]fluorene-6,12-dione using DFT/B3LYP/6-311G(d,p)

| Center Number | Atomic Number | Forces (Hartrees/Bohr) |              |              |
|---------------|---------------|------------------------|--------------|--------------|
|               |               | X                      | Y            | Z            |
| 1             | 6             | 0.000000000            | 0.000091576  | 0.000096419  |
| 2             | 6             | 0.000000000            | -0.000089065 | -0.000083981 |
| 3             | 6             | 0.000000000            | -0.000032445 | -0.000045509 |
| 4             | 6             | 0.000000000            | 0.000077942  | 0.000052919  |
| 5             | 6             | 0.000000000            | -0.000151051 | -0.000052355 |
| 6             | 6             | 0.000000000            | 0.000068887  | 0.000182963  |
| 7             | 6             | 0.000000000            | -0.000077942 | -0.000052919 |
| 8             | 6             | 0.000000000            | 0.000032445  | 0.000045509  |
| 9             | 6             | 0.000000000            | -0.000068887 | -0.000182963 |
| 10            | 6             | 0.000000000            | -0.000047018 | -0.000098794 |
| 11            | 6             | 0.000000000            | 0.000066002  | -0.000024757 |
| 12            | 6             | 0.000000000            | -0.000019022 | 0.000090868  |
| 13            | 6             | 0.000000000            | 0.000054199  | -0.000067664 |
| 14            | 6             | 0.000000000            | 0.000151051  | 0.000052355  |
| 15            | 6             | 0.000000000            | -0.000091576 | -0.000096419 |
| 16            | 6             | 0.000000000            | 0.000089065  | 0.000083981  |
| 17            | 6             | 0.000000000            | 0.000047018  | 0.000098794  |
| 18            | 6             | 0.000000000            | -0.000066002 | 0.000024757  |
| 19            | 6             | 0.000000000            | 0.000019022  | -0.000090868 |
| 20            | 6             | 0.000000000            | -0.000054199 | 0.000067664  |
| 21            | 8             | 0.000000000            | 0.000091805  | 0.000071031  |
| 22            | 8             | 0.000000000            | -0.000091805 | -0.000071031 |
| 23            | 1             | 0.000000000            | -0.000022860 | -0.000034428 |
| 24            | 1             | 0.000000000            | 0.000022860  | 0.000034428  |
| 25            | 1             | 0.000000000            | 0.000006212  | 0.000041143  |
| 26            | 1             | 0.000000000            | -0.000019793 | 0.000008219  |
| 27            | 1             | 0.000000000            | 0.000001876  | -0.000013222 |
| 28            | 1             | 0.000000000            | -0.000000913 | 0.000026567  |
| 29            | 1             | 0.000000000            | -0.000006212 | -0.000041143 |
| 30            | 1             | 0.000000000            | 0.000019793  | -0.000008219 |
| 31            | 1             | 0.000000000            | -0.000001876 | 0.000013222  |
| 32            | 1             | 0.000000000            | 0.000000913  | -0.000026567 |

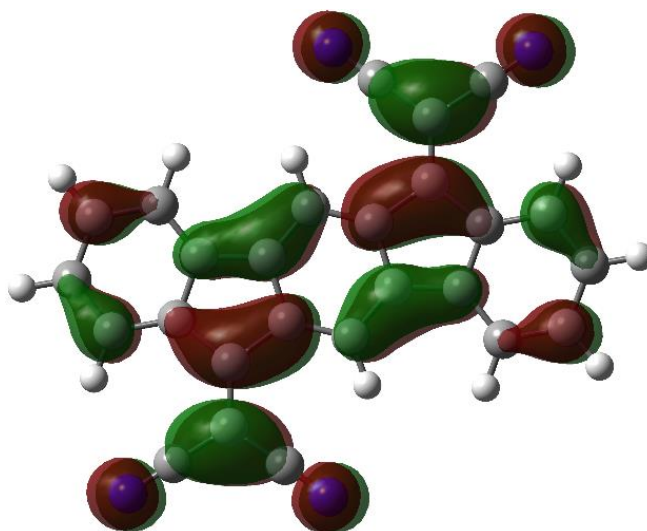

$$E_{\text{LUMO}} = -4.18 \text{ eV}$$

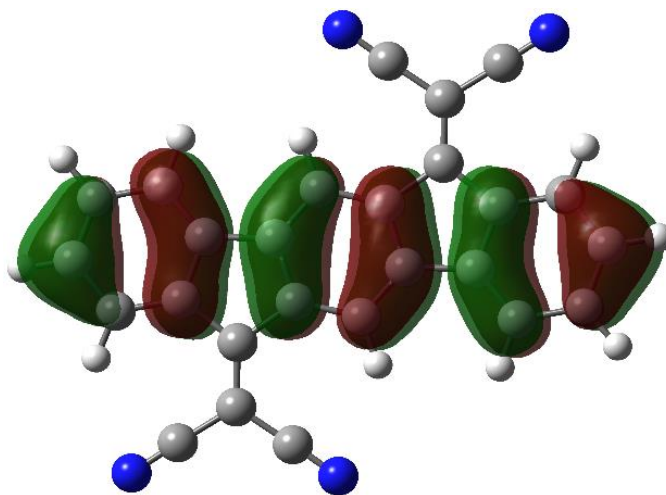

$$E_{\text{HOMO}} = -6.73 \text{ eV}$$

$$\text{Dipole moment } (\mu) = 0.0000 \text{ D}$$

**Fig. S7** Molecular Orbitals for the Singlet Ground State of 2,2'-(indeno[1,2-*b*]fluorene-6,12-diylidene) dimalononitrile as calculated with DFT RB3LYP/6-311G(d,p). Hydrogens are omitted for clarity.

Atomic coordinates of the optimised geometry of 2,2'-(indeno[1,2-*b*]fluorene-6,12-diylidene) dimalononitrile using DFT/B3LYP/6-311G(d,p)

| Center<br>Number | Atomic<br>Number | Forces (Hartrees/Bohr) |              |              |
|------------------|------------------|------------------------|--------------|--------------|
|                  |                  | X                      | Y            | Z            |
| 1                | 6                | -0.000005498           | 0.000039013  | -0.000052955 |
| 2                | 6                | 0.000004965            | -0.000044195 | 0.000041863  |
| 3                | 6                | -0.000005630           | 0.000054030  | -0.000044871 |
| 4                | 6                | 0.000005124            | -0.000048327 | 0.000041389  |
| 5                | 6                | 0.000003033            | -0.000002107 | 0.000042119  |
| 6                | 6                | 0.000005218            | -0.000053088 | 0.000039584  |
| 7                | 6                | -0.000005124           | 0.000048327  | -0.000041389 |
| 8                | 6                | 0.000005630            | -0.000054030 | 0.000044871  |
| 9                | 6                | -0.000005218           | 0.000053088  | -0.000039584 |
| 10               | 6                | 0.000003130            | -0.000012301 | 0.000036724  |
| 11               | 6                | -0.000000848           | 0.000000076  | -0.000012116 |
| 12               | 6                | 0.000002338            | -0.000034208 | 0.000010803  |
| 13               | 6                | -0.000003626           | 0.000033759  | -0.000029585 |
| 14               | 6                | -0.000003033           | 0.000002107  | -0.000042119 |
| 15               | 6                | 0.000005498            | -0.000039013 | 0.000052955  |
| 16               | 6                | -0.000004965           | 0.000044195  | -0.000041863 |
| 17               | 6                | -0.000003130           | 0.000012301  | -0.000036724 |
| 18               | 6                | 0.000000848            | -0.000000076 | 0.000012116  |
| 19               | 6                | -0.000002338           | 0.000034208  | -0.000010803 |
| 20               | 6                | 0.000003626            | -0.000033759 | 0.000029585  |
| 21               | 6                | -0.000002061           | 0.000060785  | 0.000010833  |
| 22               | 6                | 0.000002061            | -0.000060785 | -0.000010833 |
| 23               | 6                | 0.000000773            | -0.000064242 | -0.000031598 |
| 24               | 6                | -0.000001818           | -0.000042700 | -0.000054461 |
| 25               | 6                | 0.000001818            | 0.000042700  | 0.000054461  |
| 26               | 6                | -0.000000773           | 0.000064242  | 0.000031598  |
| 27               | 7                | 0.000000219            | 0.000024504  | 0.000019419  |
| 28               | 7                | 0.000000501            | 0.000023776  | 0.000022994  |
| 29               | 7                | -0.000000501           | -0.000023776 | -0.000022994 |
| 30               | 7                | -0.000000219           | -0.000024504 | -0.000019419 |
| 31               | 1                | -0.000000981           | 0.000009869  | -0.000007509 |
| 32               | 1                | 0.000000981            | -0.000009869 | 0.000007509  |
| 33               | 1                | -0.000000764           | 0.000005752  | -0.000007132 |
| 34               | 1                | -0.000000089           | 0.000002299  | 0.000000255  |
| 35               | 1                | -0.000000442           | -0.000000214 | -0.000006489 |
| 36               | 1                | 0.000000500            | -0.000007299 | 0.000002321  |
| 37               | 1                | 0.000000764            | -0.000005752 | 0.000007132  |
| 38               | 1                | 0.000000089            | -0.000002299 | -0.000000255 |
| 39               | 1                | 0.000000442            | 0.000000214  | 0.000006489  |
| 40               | 1                | -0.000000500           | 0.000007299  | -0.000002321 |

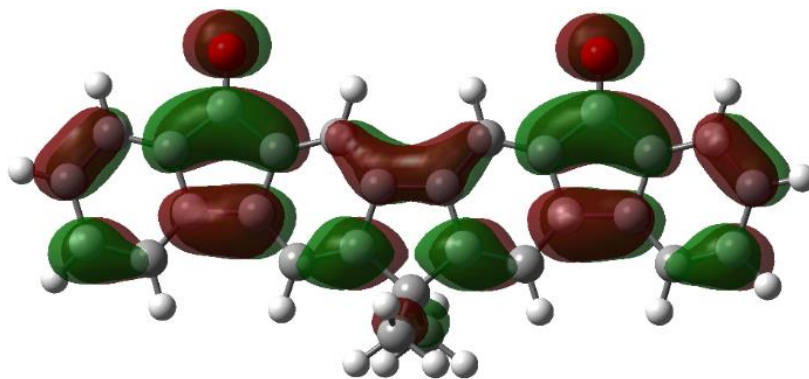

$$E_{\text{LUMO}} = -2.60 \text{ eV}$$

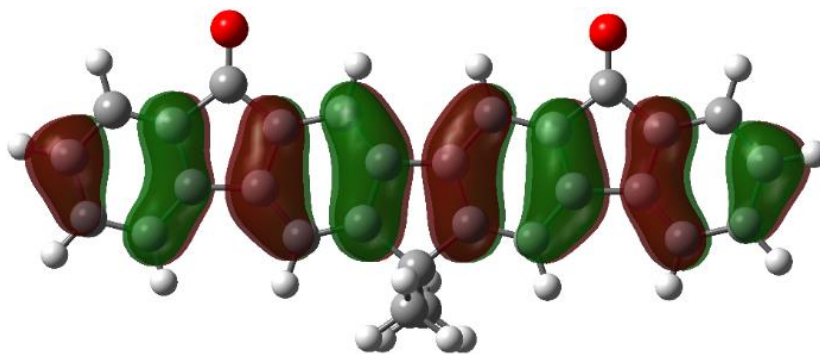

$$E_{\text{HOMO}} = -5.91 \text{ eV}$$

$$\text{Dipole moment } (\mu) = 7.1132 \text{ D}$$

**Fig. S8** Molecular Orbitals for the Singlet Ground State of bisindenofluorene-12,15-dione as calculated with DFT RB3LYP/6-311G(d,p). Hydrogens are omitted for clarity.



Atomic coordinates of the optimised geometry of bisindenofluorene-12,15-dione using DFT/B3LYP/6-311G(d,p)

| Center Number | Atomic Number | Forces (Hartrees/Bohr) |              |              |
|---------------|---------------|------------------------|--------------|--------------|
|               |               | X                      | Y            | Z            |
| 1             | 6             | -0.000048096           | 0.000107676  | 0.000095250  |
| 2             | 6             | 0.000027980            | -0.000099961 | -0.000064757 |
| 3             | 6             | 0.000036266            | -0.000006065 | -0.000053010 |
| 4             | 6             | -0.000025793           | 0.000059550  | 0.000051533  |
| 5             | 6             | 0.000017621            | -0.000089233 | -0.000047362 |
| 6             | 6             | -0.000086339           | -0.000059104 | 0.000107786  |
| 7             | 6             | 0.000020026            | 0.000180538  | 0.000016775  |
| 8             | 6             | -0.000039142           | -0.000092007 | 0.000032535  |
| 9             | 6             | 0.000062129            | -0.000022697 | -0.000093895 |
| 10            | 6             | 0.000044011            | -0.000069600 | -0.000079916 |
| 11            | 6             | 0.000024227            | 0.000058575  | -0.000019730 |
| 12            | 6             | -0.000050285           | -0.000021932 | 0.000065903  |
| 13            | 6             | 0.000052952            | 0.000057775  | -0.000060715 |
| 14            | 6             | 0.000064567            | -0.000185142 | -0.000138034 |
| 15            | 6             | -0.000097389           | 0.000041296  | 0.000148615  |
| 16            | 6             | 0.000061637            | 0.000027505  | -0.000080625 |
| 17            | 6             | 0.000064981            | 0.000120347  | -0.000062125 |
| 18            | 6             | -0.000012053           | -0.000063366 | 0.000001245  |
| 19            | 6             | -0.000018683           | 0.000067981  | 0.000043549  |
| 20            | 6             | -0.000014575           | -0.000113660 | -0.000007767 |
| 21            | 8             | -0.000021226           | 0.000064211  | 0.000046216  |
| 22            | 6             | 0.000037716            | -0.000088416 | -0.000075689 |
| 23            | 6             | -0.000033177           | 0.000125369  | 0.000078498  |
| 24            | 6             | 0.000036720            | -0.000066584 | -0.000068808 |
| 25            | 6             | -0.000050475           | -0.000064878 | 0.000055419  |
| 26            | 6             | 0.000031683            | 0.000075273  | -0.000026135 |
| 27            | 6             | -0.000038953           | -0.000016350 | 0.000051212  |
| 28            | 6             | 0.000016084            | -0.000102719 | -0.000048557 |
| 29            | 6             | -0.000028560           | 0.000054632  | 0.000032265  |
| 30            | 6             | -0.000008300           | 0.000051059  | 0.000046534  |
| 31            | 8             | -0.000022878           | 0.000062253  | 0.000048070  |
| 32            | 1             | 0.000022482            | 0.000005435  | -0.000030559 |
| 33            | 1             | -0.000001707           | 0.000034879  | 0.000011158  |
| 34            | 1             | -0.000019370           | 0.000009874  | 0.000029974  |
| 35            | 1             | -0.000006956           | -0.000022775 | 0.000004173  |
| 36            | 1             | 0.000008478            | 0.000000222  | -0.000011982 |
| 37            | 1             | -0.000014892           | -0.000002789 | 0.000020446  |
| 38            | 1             | -0.000012008           | -0.000035467 | 0.000008168  |
| 39            | 1             | -0.000016502           | 0.000017334  | 0.000027770  |
| 40            | 1             | 0.000007554            | 0.000023830  | -0.000004758 |
| 41            | 1             | -0.000003627           | -0.000014133 | 0.000001610  |

|    |   |              |              |              |
|----|---|--------------|--------------|--------------|
| 42 | 1 | 0.000014124  | 0.000002223  | -0.000019496 |
| 43 | 1 | 0.000003164  | 0.000036597  | 0.000004672  |
| 44 | 1 | -0.000001452 | -0.000014370 | -0.000005231 |
| 45 | 1 | 0.000005430  | -0.000006208 | -0.000012959 |
| 46 | 1 | -0.000007564 | -0.000001104 | -0.000007902 |
| 47 | 1 | 0.000009375  | -0.000004091 | 0.000004029  |
| 48 | 1 | 0.000008838  | -0.000006809 | -0.000010559 |
| 49 | 1 | 0.000001956  | -0.000014971 | -0.000002831 |

---

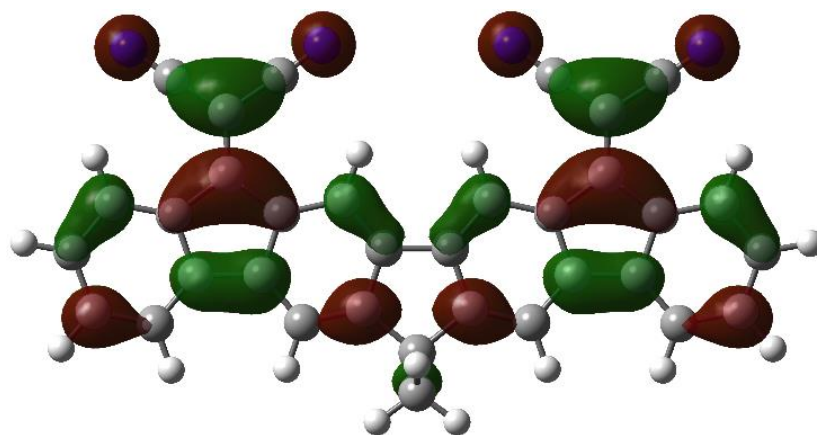

$E_{\text{LUMO}} = -3.49 \text{ eV}$

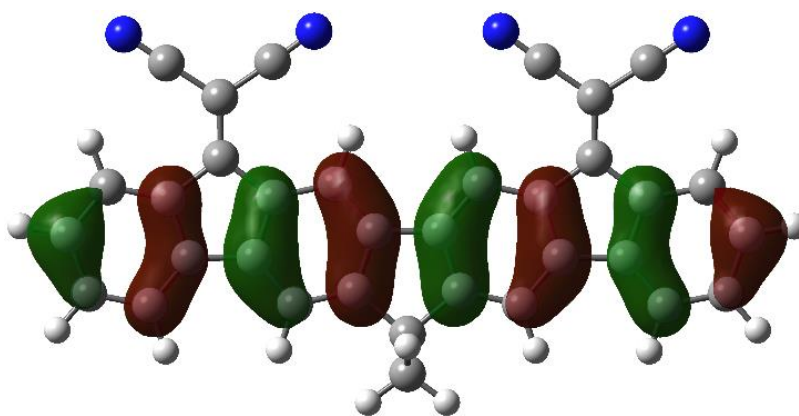

$E_{\text{HOMO}} = -6.25 \text{ eV}$

Dipole moment ( $\mu$ ) = 13.3020 D

**Fig. S9** Molecular Orbitals for the Singlet Ground State of 2,2'-(bisindenofluorene-12,15-diylidene) dimalononitrile as calculated with DFT RB3LYP/6-311G(d,p). Hydrogens are omitted for clarity.

Atomic coordinates of the optimised geometry of 2,2'-(bisindenofluorene-12,15-diylidene) dimalononitrile using DFT/B3LYP/6-311G(d,p)

| Center<br>Number | Atomic<br>Number | Forces (Hartrees/Bohr) |              |              |
|------------------|------------------|------------------------|--------------|--------------|
|                  |                  | X                      | Y            | Z            |
| 1                | 6                | -0.000000423           | -0.000000965 | -0.000002690 |
| 2                | 6                | -0.000002480           | -0.000000091 | 0.000000275  |
| 3                | 6                | 0.000001339            | 0.000000394  | 0.000001770  |
| 4                | 6                | -0.000000768           | 0.000001448  | 0.000000838  |
| 5                | 6                | 0.000001580            | -0.000003039 | 0.000000541  |
| 6                | 6                | 0.000001040            | 0.000002789  | -0.000001148 |
| 7                | 6                | -0.000000339           | -0.000006726 | -0.000001953 |
| 8                | 6                | -0.000000064           | -0.000000425 | -0.000000292 |
| 9                | 6                | 0.000001173            | 0.000003528  | -0.000001914 |
| 10               | 6                | -0.000000503           | 0.000000289  | 0.000003153  |
| 11               | 6                | 0.000000833            | -0.000000431 | -0.000001090 |
| 12               | 6                | 0.000000238            | -0.000000279 | -0.000000148 |
| 13               | 6                | 0.000000730            | -0.000001741 | 0.000000272  |
| 14               | 6                | -0.000002743           | 0.000010317  | 0.000008021  |
| 15               | 6                | 0.000003054            | -0.000003572 | -0.000006021 |
| 16               | 6                | 0.000000505            | -0.000000071 | -0.000000564 |
| 17               | 6                | -0.000001571           | -0.000001001 | 0.000002501  |
| 18               | 6                | -0.000001860           | 0.000002203  | 0.000000429  |
| 19               | 6                | 0.000000593            | 0.000001563  | 0.000000516  |
| 20               | 6                | -0.000002805           | -0.000002687 | 0.000004310  |
| 21               | 6                | 0.000001991            | 0.000000572  | 0.000000393  |
| 22               | 6                | 0.000002064            | -0.000000903 | -0.000000633 |
| 23               | 6                | -0.000002780           | -0.000003406 | -0.000001181 |
| 24               | 6                | 0.000000024            | -0.000000108 | -0.000001978 |
| 25               | 6                | -0.000000011           | -0.000000362 | -0.000000404 |
| 26               | 6                | -0.000000418           | -0.000001098 | -0.000000078 |
| 27               | 6                | -0.000000109           | 0.000003027  | -0.000000771 |
| 28               | 6                | 0.000003545            | -0.000004616 | -0.000001629 |
| 29               | 6                | -0.000001341           | -0.000003441 | -0.000004757 |
| 30               | 6                | 0.000001445            | 0.000005745  | -0.000000551 |
| 31               | 7                | -0.000000821           | -0.000002265 | 0.000000388  |
| 32               | 6                | -0.000002200           | 0.000004786  | 0.000002221  |
| 33               | 6                | -0.000004750           | -0.000008525 | 0.000002186  |
| 34               | 7                | 0.000004077            | 0.000003279  | -0.000002571 |
| 35               | 6                | 0.000000542            | 0.000002579  | -0.000002409 |
| 36               | 7                | -0.000000796           | -0.000003283 | 0.000000139  |
| 37               | 6                | 0.000005168            | 0.000002501  | -0.000000624 |
| 38               | 6                | -0.000005044           | 0.000000398  | 0.000005029  |
| 39               | 7                | 0.000002671            | -0.000000400 | -0.000002498 |
| 40               | 1                | -0.000000571           | -0.000000115 | 0.000000225  |
| 41               | 1                | 0.000000444            | -0.000000590 | 0.000000308  |

|    |   |              |              |              |
|----|---|--------------|--------------|--------------|
| 42 | 1 | 0.000000374  | -0.000000889 | -0.000001706 |
| 43 | 1 | -0.000000186 | -0.000000462 | 0.000000433  |
| 44 | 1 | -0.000000147 | 0.000000434  | 0.000000242  |
| 45 | 1 | 0.000000229  | 0.000000934  | -0.000000481 |
| 46 | 1 | 0.000000422  | 0.000000363  | 0.000000074  |
| 47 | 1 | -0.000000233 | 0.000001413  | -0.000000031 |
| 48 | 1 | -0.000000357 | -0.000000248 | 0.000000926  |
| 49 | 1 | -0.000000085 | 0.000000347  | 0.000000376  |
| 50 | 1 | 0.000000183  | 0.000000569  | -0.000000375 |
| 51 | 1 | 0.000000121  | -0.000001055 | 0.000000200  |
| 52 | 1 | -0.000000584 | 0.000000689  | 0.000000495  |
| 53 | 1 | -0.000000442 | 0.000000856  | 0.000000322  |
| 54 | 1 | -0.000000268 | 0.000000288  | 0.000000070  |
| 55 | 1 | 0.000000127  | 0.000000191  | 0.000000318  |
| 56 | 1 | 0.000000159  | 0.000000716  | 0.000000651  |
| 57 | 1 | 0.000000027  | 0.000000579  | 0.000000878  |

---

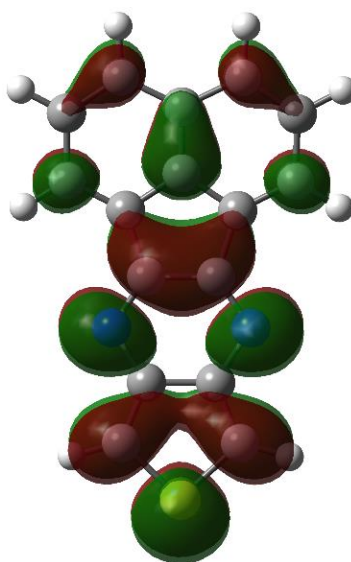

$$E_{\text{LUMO}} = -2.39 \text{ eV}$$

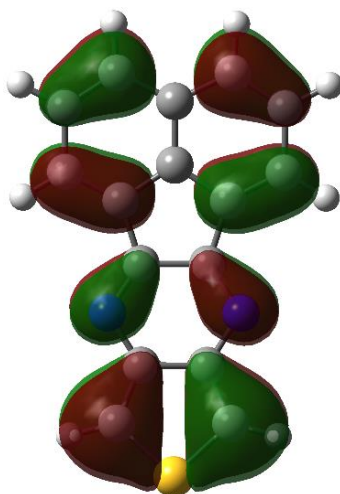

$$E_{\text{HOMO}} = -5.97 \text{ eV}$$

$$\text{Dipole moment } (\mu) = 1.5845 \text{ D}$$

**Fig. S10** Molecular Orbitals for the Singlet Ground State of fused aromatic thieno[3,4-*b*]pyrazine as calculated with DFT RB3LYP/6-311G(d,p). Hydrogens are omitted for clarity.

Atomic coordinates of the optimised geometry of fused aromatic thieno[3,4-*b*]pyrazine using DFT/B3LYP/6-311G(d,p)

| Center Number | Atomic Number | Forces (Hartrees/Bohr) |              |              |
|---------------|---------------|------------------------|--------------|--------------|
|               |               | X                      | Y            | Z            |
| 1             | 6             | 0.000000000            | 0.000296162  | -0.000024593 |
| 2             | 6             | 0.000000000            | -0.000263237 | 0.000282512  |
| 3             | 6             | 0.000000000            | -0.000122579 | -0.000366171 |
| 4             | 6             | 0.000000000            | 0.000259376  | 0.000145054  |
| 5             | 16            | 0.000000000            | -0.000282754 | -0.000061311 |
| 6             | 7             | 0.000000000            | 0.000378351  | -0.000113722 |
| 7             | 6             | 0.000000000            | -0.000044091 | -0.000313875 |
| 8             | 6             | 0.000000000            | -0.000170138 | 0.000267423  |
| 9             | 7             | 0.000000000            | 0.000297266  | 0.000260220  |
| 10            | 6             | 0.000000000            | -0.000182650 | 0.000249232  |
| 11            | 6             | 0.000000000            | -0.000092057 | -0.000019961 |
| 12            | 6             | 0.000000000            | -0.000063014 | -0.000302501 |
| 13            | 6             | 0.000000000            | 0.000096365  | -0.000068373 |
| 14            | 6             | 0.000000000            | -0.000066965 | -0.000000847 |
| 15            | 6             | 0.000000000            | -0.000008659 | 0.000030468  |
| 16            | 6             | 0.000000000            | 0.000006934  | 0.000001504  |
| 17            | 6             | 0.000000000            | 0.000004739  | -0.000031318 |
| 18            | 6             | 0.000000000            | -0.000061301 | -0.000026966 |
| 19            | 6             | 0.000000000            | 0.000059390  | 0.000102146  |
| 20            | 1             | 0.000000000            | -0.000018881 | 0.000012540  |
| 21            | 1             | 0.000000000            | -0.000011991 | -0.000019235 |
| 22            | 1             | 0.000000000            | -0.000003960 | 0.000014167  |
| 23            | 1             | 0.000000000            | 0.000005374  | 0.000011077  |
| 24            | 1             | 0.000000000            | -0.000011355 | -0.000004183 |
| 25            | 1             | 0.000000000            | -0.000012068 | -0.000000896 |
| 26            | 1             | 0.000000000            | 0.000009480  | -0.000007856 |
| 27            | 1             | 0.000000000            | 0.000002263  | -0.000014535 |

## S2.2 Optimized geometry structures of the trimer model compounds

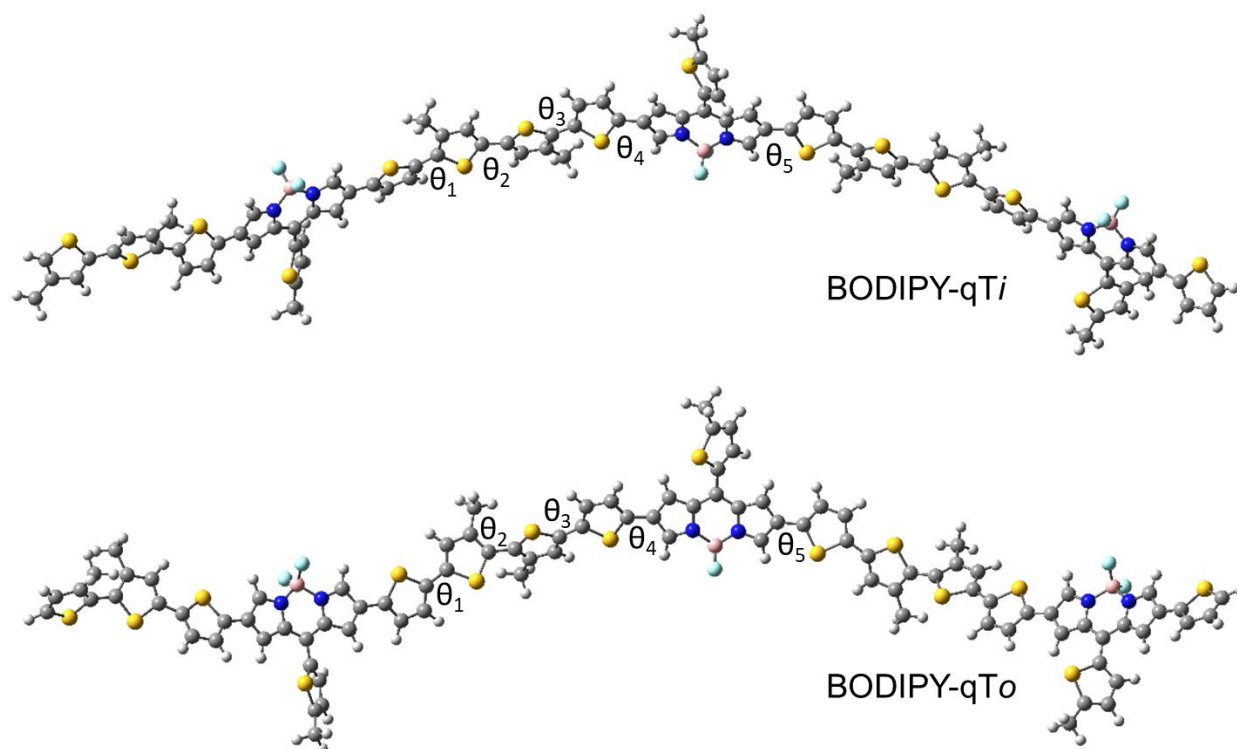

**Fig. S11** Ground state geometry optimizations of BODIPY-qTi and BODIPY-qTo. Color scheme: carbon, gray; nitrogen, blue; sulfur, orange; boron, pink; fluorine, cyan. Optimized structures calculated using DFT at the B3LYP/6-311G(d,p) level of theory.  $\theta_1$ ,  $\theta_2$ ,  $\theta_3$ ,  $\theta_4$  and  $\theta_5$  are the calculated dihedral angles.



### S3. Nuclear Magnetic Resonance (NMR) spectra of all new compounds

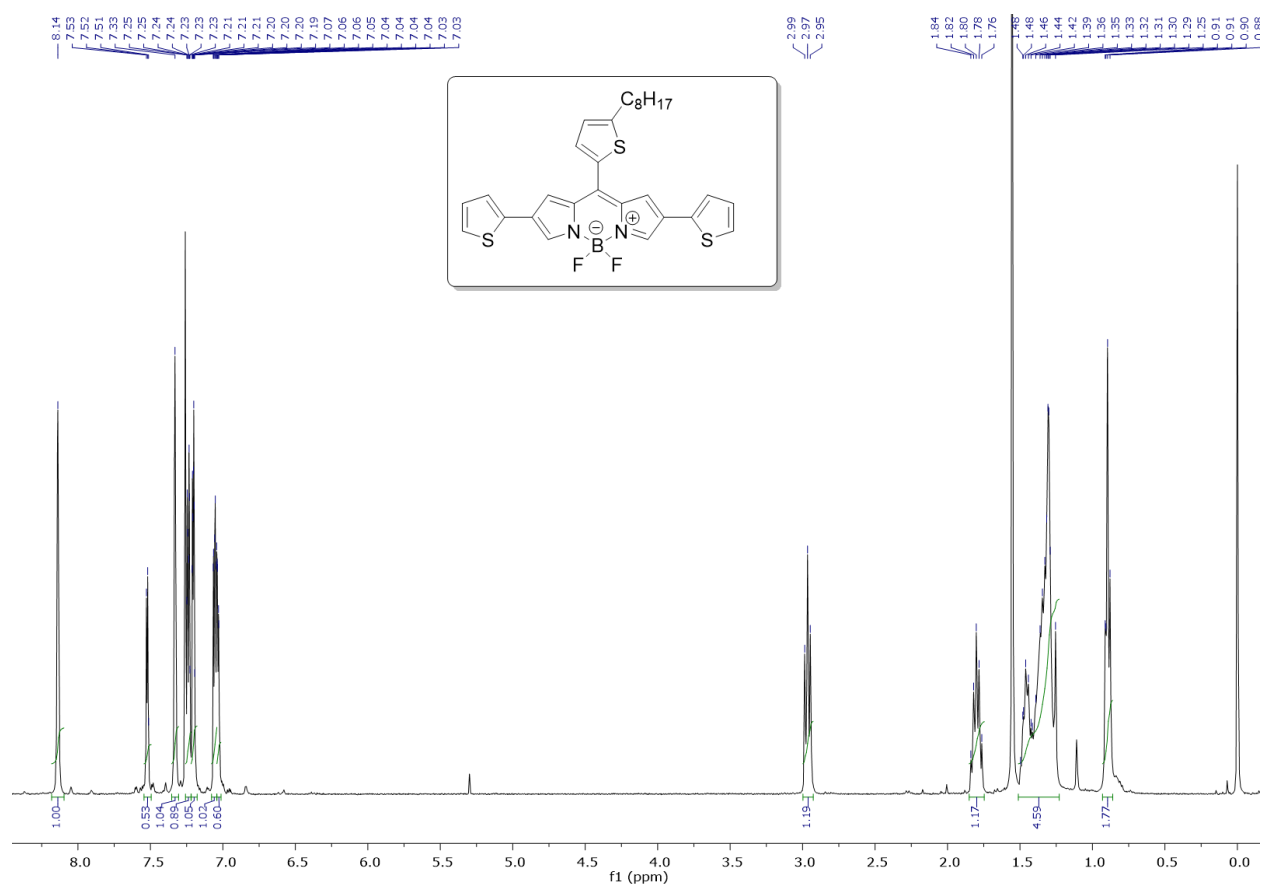

**Fig. S12** <sup>1</sup>H-NMR spectrum of 5,5-difluoro-10-(5-octylthiophen-2-yl)-2,8-di(thiophen-2-yl)-5H-4λ<sup>4</sup>,5λ<sup>4</sup>-dipyrrolo[1,2-c:2',1'-f][1,3,2]diazaborinine (**14**).

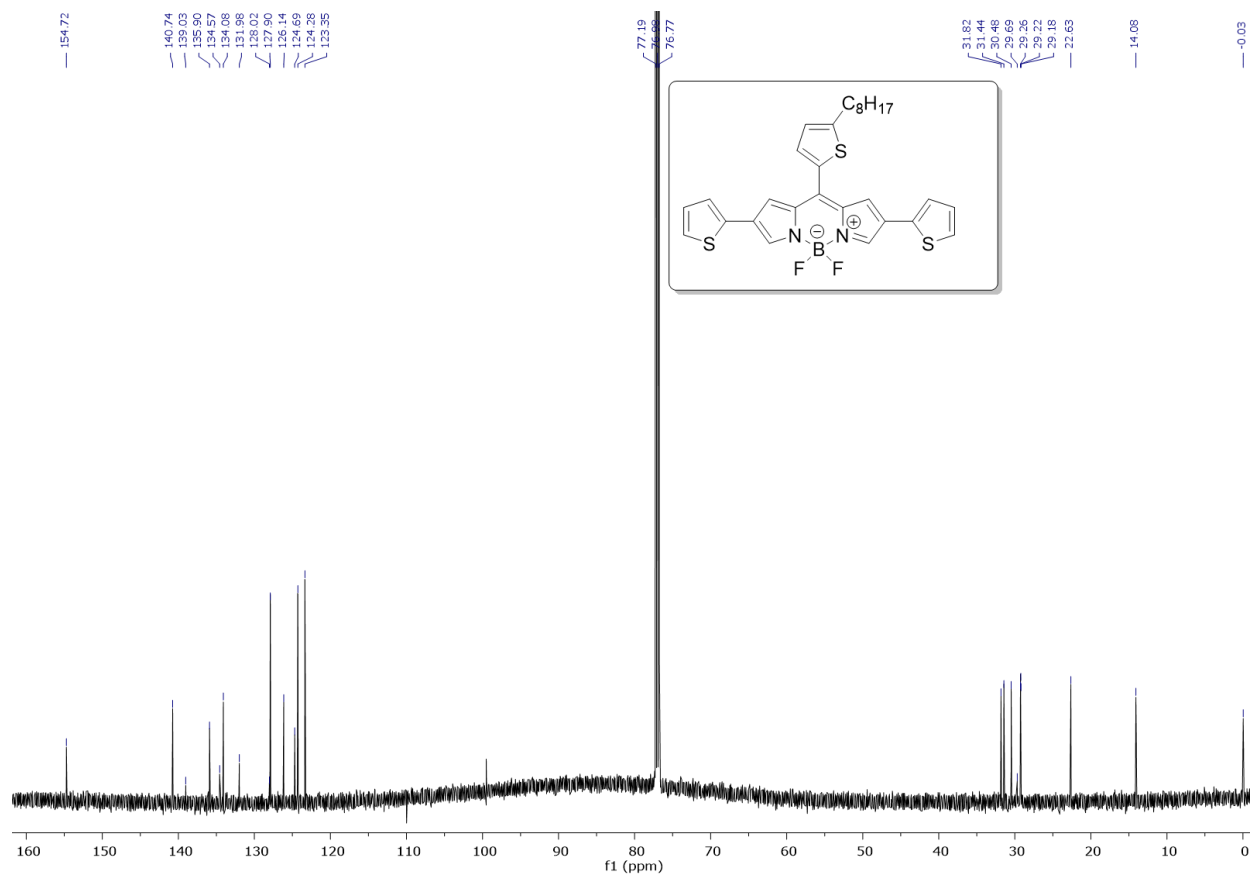

**Fig. S13** <sup>13</sup>C-NMR spectrum of 5,5-difluoro-10-(5-octylthiophen-2-yl)-2,8-di(thiophen-2-yl)-5H-4λ<sup>4</sup>,5λ<sup>4</sup>-dipyrrolo[1,2-*c*:2',1'-*f*][1,3,2]diazaborinine (**14**).

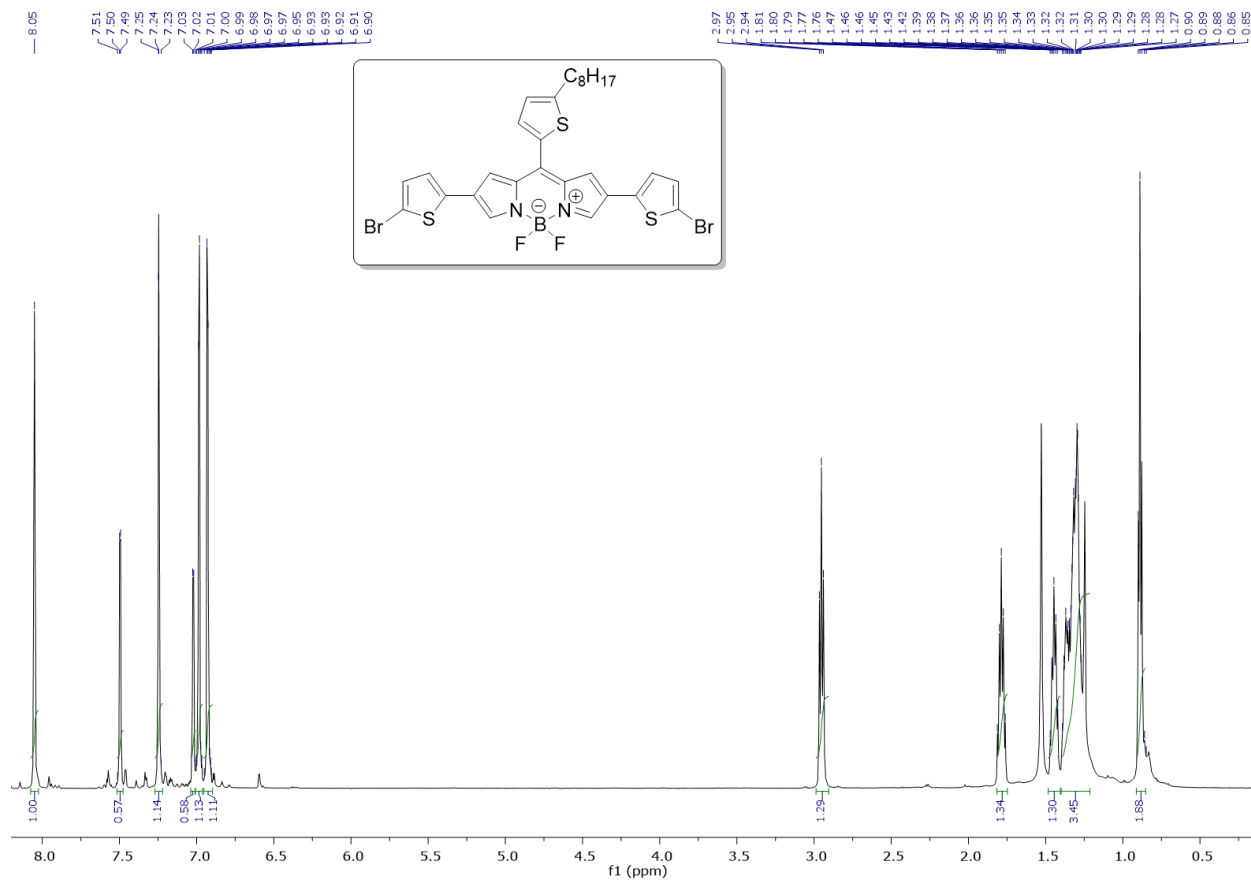

**Fig. S14**  $^1\text{H-NMR}$  spectrum of 2,8-bis(5-bromothiophen-2-yl)-5,5-difluoro-10-(5-octylthiophen-2-yl)-5*H*-4 $\lambda^4$ ,5 $\lambda^4$ -dipyrrolo[1,2-*c*:2',1'-*f*][1,3,2]diazaborinine (**15**).

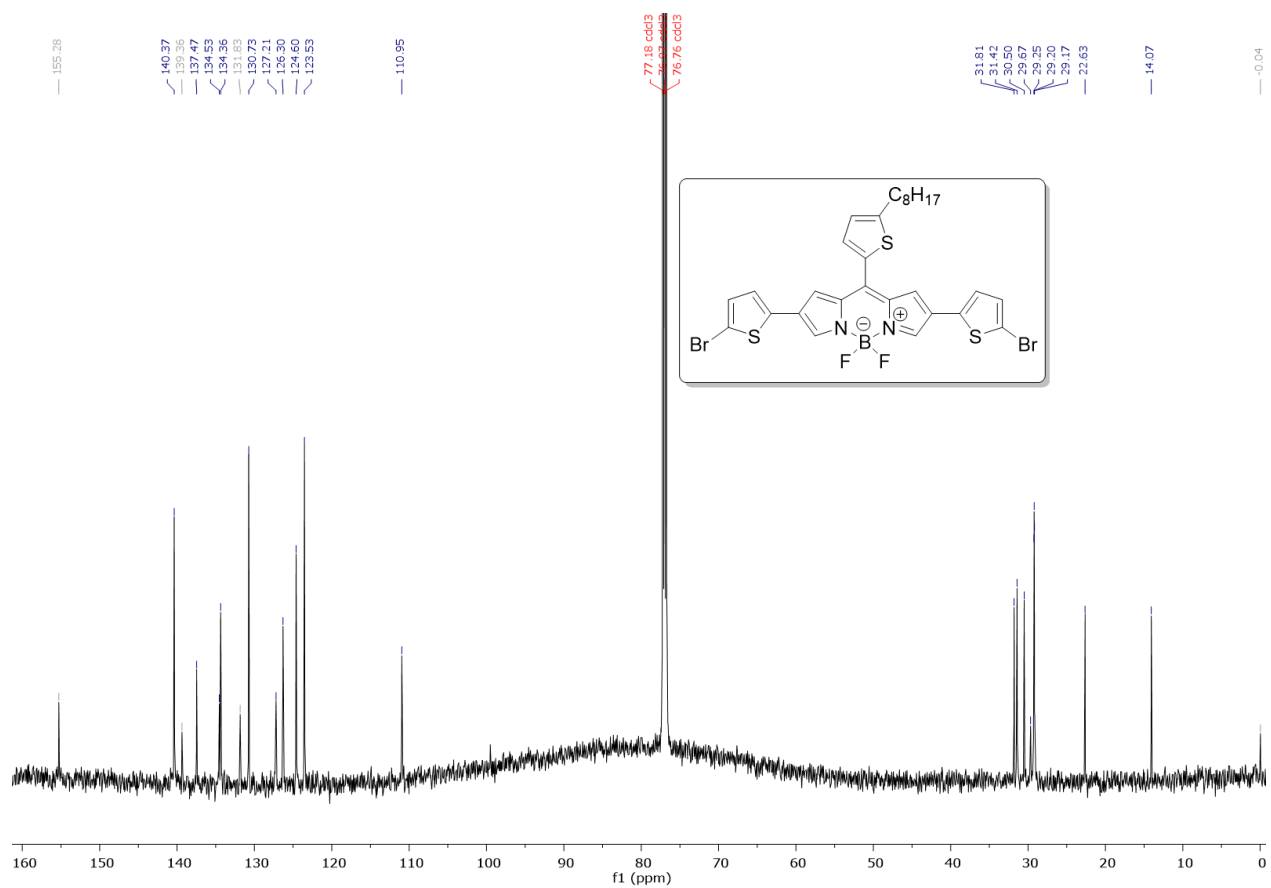

**Fig. S15**  $^{13}\text{C}$ -NMR spectrum of 2,8-bis(5-bromothiophen-2-yl)-5,5-difluoro-10-(5-octylthiophen-2-yl)-5H-4 $\lambda^4$ ,5 $\lambda^4$ -dipyrrolo[1,2-c:2',1'-f][1,3,2]diazaborinine (**15**).

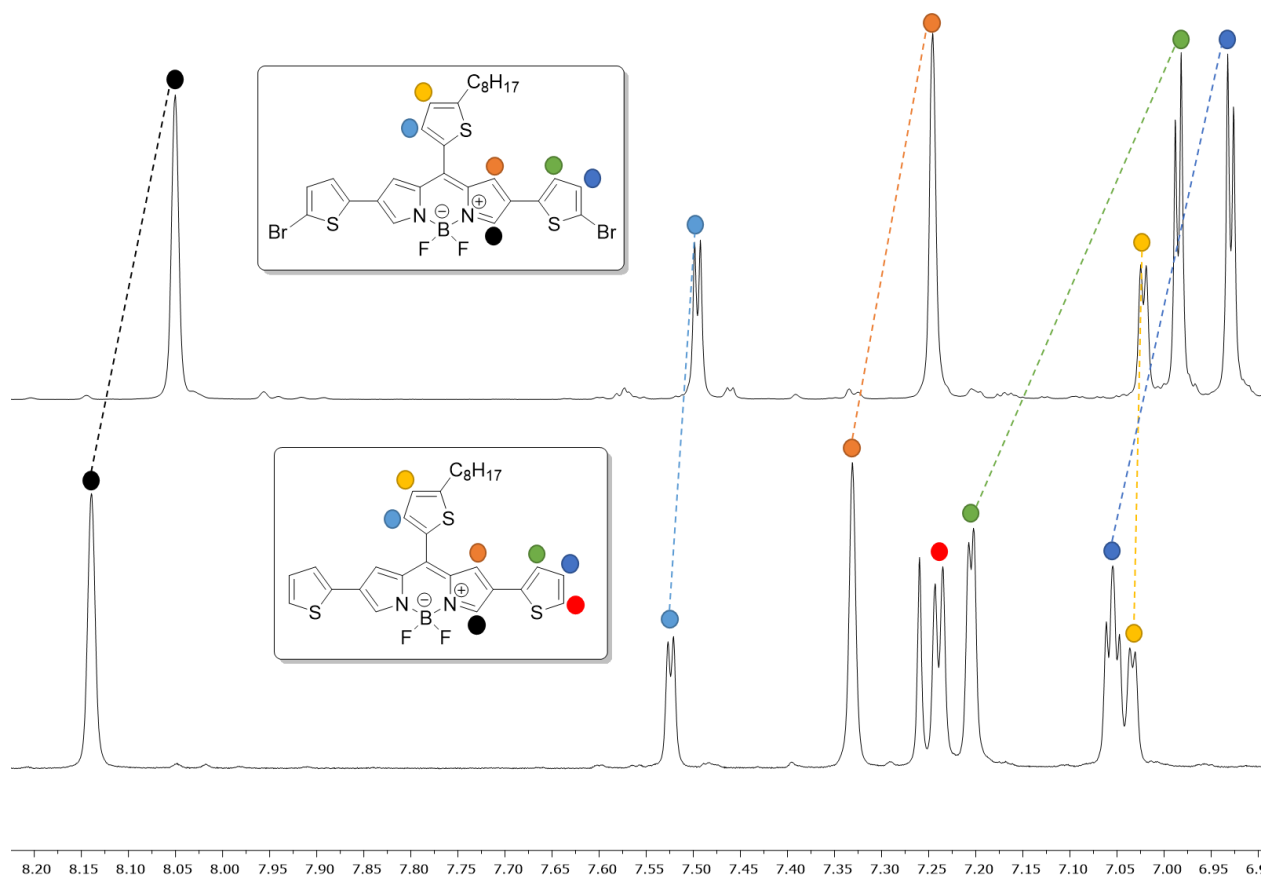

**Fig. S16** Aromatic region (6.90–8.20 ppm) of the <sup>1</sup>H-NMR spectra of monomers **14** and **15** with assignment of the representative protons.

#### S4. Mass spectrum of the final compound

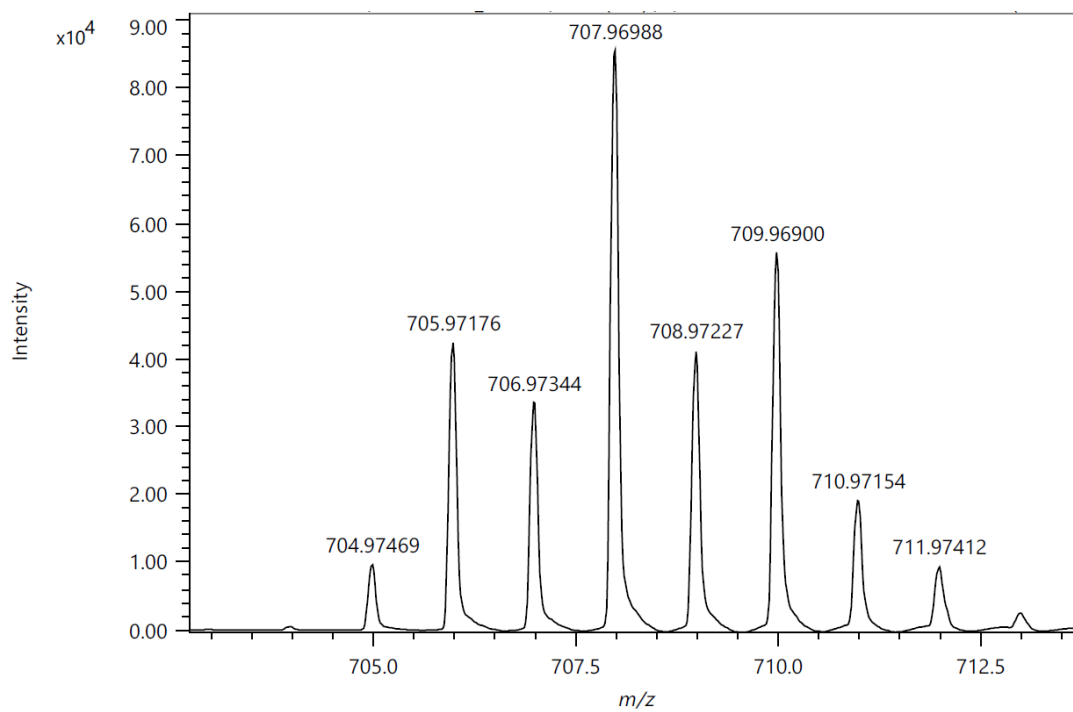

**Fig. S17** FD+(eiFI) mass spectrum of 15.

## S5. Absorption spectra of the monomers

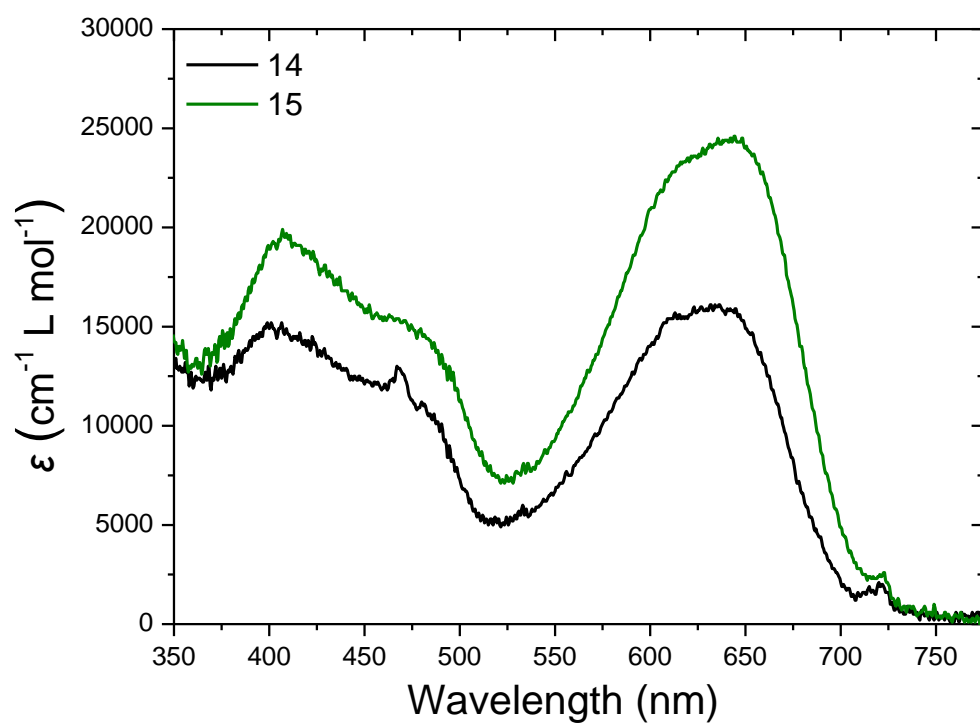

**Fig. S18** Absorption spectra in chloroform solution of monomers 14 and 15.

**S6. Gel permeation chromatography (GPC) graphs of the polymers**

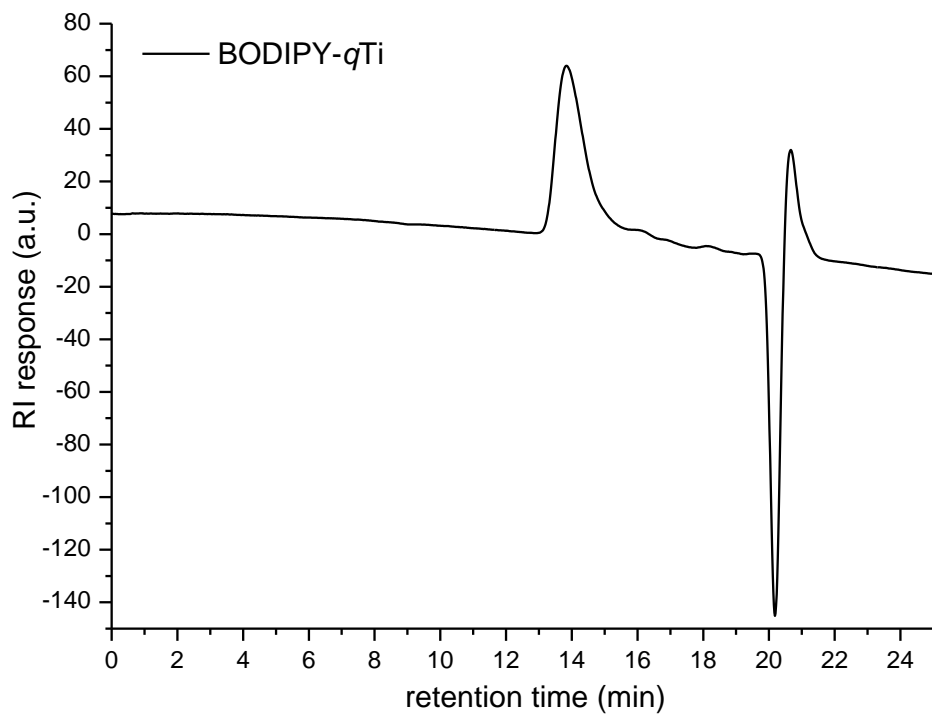

**Fig. S19** Gel Permeation Chromatography (GPC) graph of BODIPY-qTi



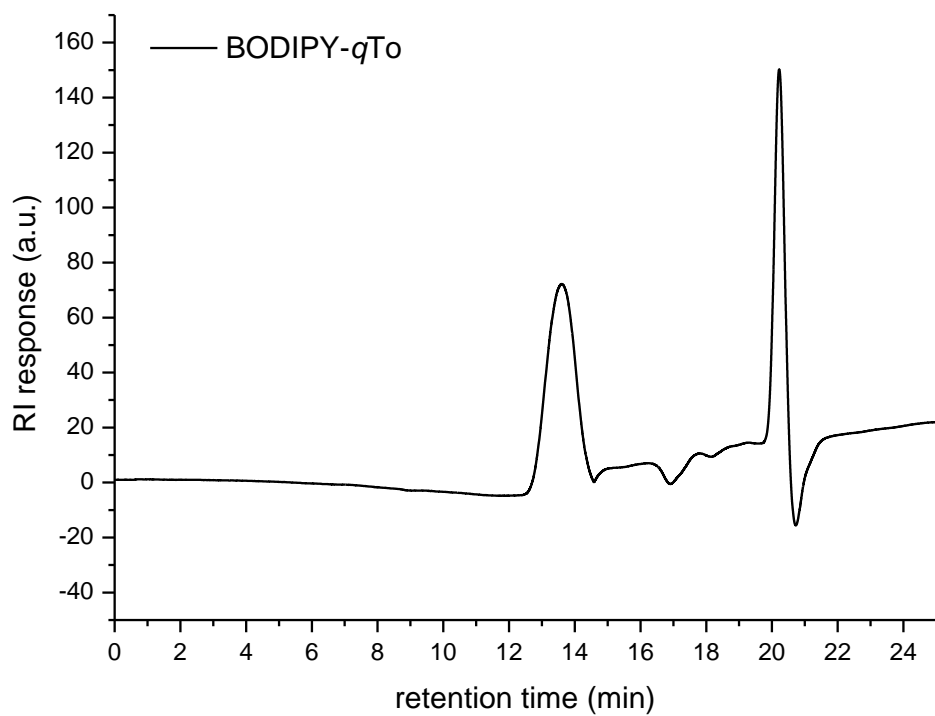

**Fig. S20** Gel Permeation Chromatography (GPC) graph of BODIPY-qTo

## S7. Hole mobility measurements

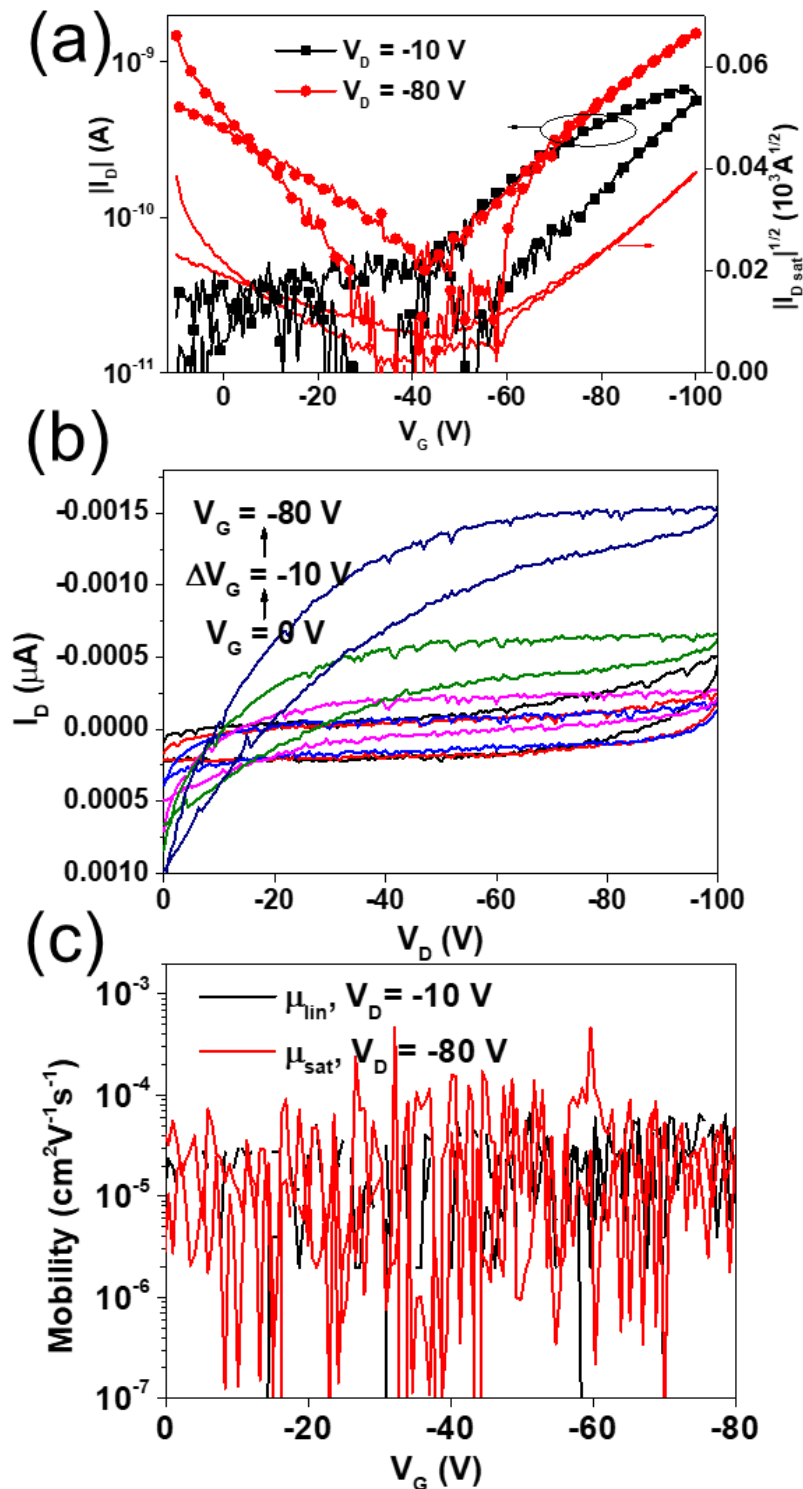

**Fig. S21** Transfer (a), output (b) characteristics of BC/TG configuration OFET device and mobility calculation based on first derivative of the linear regime transfer curve and first derivative of the square root of the saturation regime transfer curve (c) for the with BODIPY-qT<sub>o</sub>.

## S8. Electron mobility measurements

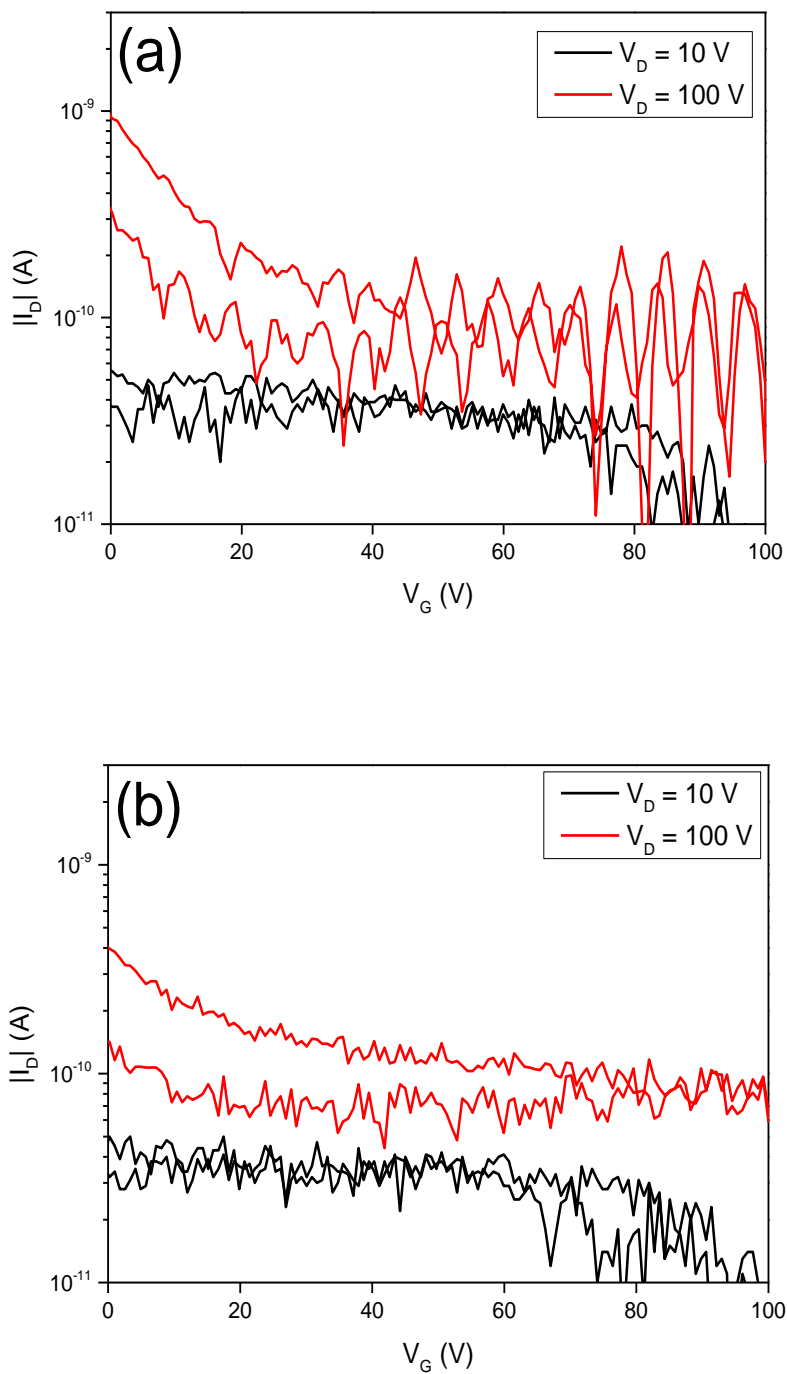

**Fig. S22** Transfer curves of BG/TC configuration OFET device of (a) BODIPY-qTi and (b) BODIPY-qTo.

## S9. References

- [S1] L. M. Harwood, *Aldrichim. Acta*, 1985, **18**, 25.
- [S2] B. M. Squeo, N. Gasparini, T. Ameri, A. Palma-Caldo, S. Allard, V. G. Gregoriou, C. J. Brabec, U. Scherf and C. L. Chochos, *J. Mater. Chem. A*, 2015, **3**, 16279.
- [S3] C. M. Cardona, W. Li, A. E. Kaifer, D. Stockdale and G. C. Bazan, *Adv. Mater.*, 2011, **23**, 2367.
- [S4] Gaussian 03, Revision C.02, Frisch, M. J.; Trucks, G. W.; Schlegel, H. B.; Scuseria, G. E.; Robb, M. A.; Cheeseman, J. R.; Montgomery, Jr., J. A.; Vreven, T.; Kudin, K. N.; Burant, J. C.; Millam, J. M.; Iyengar, S. S.; Tomasi, J.; Barone, V.; Mennucci, B.; Cossi, M.; Scalmani, G.; Rega, N.; Petersson, G. A.; Nakatsuji, H.; Hada, M.; Ehara, M.; Toyota, K.; Fukuda, R.; Hasegawa, J.; Ishida, M.; Nakajima, T.; Honda, Y.; Kitao, O.; Nakai, H.; Klene, M.; Li, X.; Knox, J. E.; Hratchian, H. P.; Cross, J. B.; Bakken, V.; Adamo, C.; Jaramillo, J.; Gomperts, R.; Stratmann, R. E.; Yazyev, O.; Austin, A. J.; Cammi, R.; Pomelli, C.; Ochterski, J. W.; Ayala, P. Y.; Morokuma, K.; Voth, G. A.; Salvador, P.; Dannenberg, J. J.; Zakrzewski, V. G.; Dapprich, S.; Daniels, A. D.; Strain, M. C.; Farkas, O.; Malick, D. K.; Rabuck, A. D.; Raghavachari, K.; Foresman, J. B.; Ortiz, J. V.; Cui, Q.; Baboul, A. G.; Clifford, S.; Cioslowski, J.; Stefanov, B. B.; Liu, G.; Liashenko, A.; Piskorz, P.; Komaromi, I.; Martin, R. L.; Fox, D. J.; Keith, T.; Al-Laham, M. A.; Peng, C. Y.; Nanayakkara, A.; Challacombe, M.; Gill, P. M. W.; Johnson, B.; Chen, W.; Wong, M. W.; Gonzalez, C.; and Pople, J. A., Gaussian, Inc., Wallingford CT, **2004**.
- [S5] H. Bronstein, D. S. Leem, R. Hamilton, P. Woebkenberg, S. King, W. Zhang, R. S. Ashraf, M. Heeney, T. D. Anthopoulos, J. de Mello and I. McCulloch, *Macromolecules*, 2011, **44**, 6649.
- [S6] L. Biniek, C. L. Chochos, N. Leclerc, O. Boyron, S. Fall, P. Lévêque and T. Heiser, *J. Polym. Sci. Part A: Polym. Chem.*, 2012, **50**, 1861.

- [S7] L. Biniek, S. Fall, C. L. Chochos, N. Leclerc, P. Lévêque and T. Heiser, *Org. Electron.*, 2012, **13**, 114.
- [S8] J. Ku, Y. Lansac and Y. H. Jang, *J. Phys. Chem. C*, 2011, **115**, 21508.
- [S9] C. Risko, M. D. McGehee and J.-L. Brédas, *Chem. Sci.*, 2011, **2**, 1200.
- [S10] A. D. Becke, *J. Chem. Phys.*, 1993, **98**, 5648.
- [S11] C. T. Lee, W. T. Yang and R. G. Parr, *Phys. Rev. B*, 1988, **37**, 785.
- [S12] L.-L. Chua, J. Zaumseil, J.-F. Chang, E. C.-W. Ou, P. K.-H. Ho, H. Sirringhaus and R. H. Friend, *Nature*, 2005, **434**, 194.
